# Supplementary material for: RNA-Seq Identifies Key Reproductive Gene Expression Alterations in Response to Cadmium Exposure
Source: Biomed Res Int. 2014 May 27;2014:529271. doi: 10.1155/2014/529271 (PMC4058285; doi:10.1155/2014/529271)
Supplement: Supplementary file 1 — Table S1. Differentially expressed genes modulated by cadmium. [file 529271.f1.xlsx]

## Sheet: Sheet1
Supplementary table 1. Differentially expressed (DE) genes. 830 DE genes identified under the threshold of a false discovery rate (FDR) of approximately 0.5%.
gene_id	gene_name	sample_1	sample_2	status	value_1	value_2	log2_fold_change	test_stat	p_value	q_value	significant
XLOC_000005	Rb1cc1	High	Low	OK	9.17517	34.982	1.93081	-4.70384	2.55319e-06	0.000901073	yes
XLOC_000265	Gm19589	High	Low	OK	3.14029	0.0760437	-5.36793	5.00431	5.60625e-07	0.000271851	yes
XLOC_000387	Ren1,Ren2	High	Low	OK	16.6793	2.14624	-2.95818	5.79521	6.82371e-09	8.8082e-06	yes
XLOC_000424	Aspm	High	Low	OK	0.442728	1.43657	1.69813	-3.40557	0.000660256	0.044854	yes
XLOC_000430	Fam5c	High	Low	OK	0.284462	2.0508	2.84988	-3.94921	7.84106e-05	0.0118597	yes
XLOC_000726	Tsga10	High	Low	OK	16.1851	44.9899	1.47494	-3.60427	0.000313032	0.0291099	yes
XLOC_000893	Nmur1	High	Low	OK	13.8117	3.43457	-2.00769	4.06195	4.86653e-05	0.00833736	yes
XLOC_001015	Btg2	High	Low	OK	1.28991	4.76335	1.8847	-3.67221	0.000240462	0.0245745	yes
XLOC_001223	Ephx1	High	Low	OK	71.4109	26.6374	-1.42269	3.47694	0.000507167	0.0386294	yes
XLOC_001255	Cenpf	High	Low	OK	1.93933	5.27022	1.44231	-3.44596	0.000569032	0.0404685	yes
XLOC_001366	NA	High	Low	OK	54.5137	258.692	2.24655	-3.82435	0.000131115	0.0165696	yes
XLOC_001370	NA	High	Low	OK	0	88.4852	1.79769e+308	1.79769e+308	0.000548808	0.0396896	yes
XLOC_001372	na	High	Low	OK	2.28729	8.37261	1.87204	-4.23207	2.31546e-05	0.00493379	yes
XLOC_001382	na	High	Low	OK	6.01145	18.7819	1.64356	-3.96805	7.24618e-05	0.0114158	yes
XLOC_001387	na	High	Low	OK	0.637232	14.5005	4.50814	-4.23157	2.32066e-05	0.00493379	yes
XLOC_001411	na	High	Low	OK	7.6645	0.355663	-4.42961	4.08331	4.43985e-05	0.00773148	yes
XLOC_001503	na	High	Low	OK	6.74174	30.4975	2.1775	-3.47919	0.00050294	0.0384194	yes
XLOC_001505	na	High	Low	OK	4.10219	34.8473	3.08658	-3.80237	0.00014332	0.0173221	yes
XLOC_001507	na	High	Low	OK	6.37483	46.5243	2.86753	-3.50031	0.000464717	0.0364388	yes
XLOC_001581	na	High	Low	OK	0.0563262	6.61336	6.87543	-4.73478	2.1929e-06	0.000806166	yes
XLOC_001614	na	High	Low	OK	12.4648	1.92735	-2.69317	3.69081	0.000223537	0.0234329	yes
XLOC_001626	na	High	Low	OK	214.458	63.4964	-1.75595	4.09134	4.28896e-05	0.00751819	yes
XLOC_001778	Gcc2	High	Low	OK	0.891141	2.86496	1.68479	-3.56391	0.000365373	0.0313996	yes
XLOC_002007	Ccdc38	High	Low	OK	24.7151	73.1184	1.56484	-3.59187	0.000328318	0.0300599	yes
XLOC_002015	Ccdc41	High	Low	OK	11.5347	33.8542	1.55336	-3.76937	0.000163661	0.0189422	yes
XLOC_002226	Pde7b	High	Low	OK	7.38522	0.0571228	-7.01443	6.61432	3.73268e-11	9.40956e-08	yes
XLOC_002554	Csl	High	Low	OK	204.488	75.0456	-1.44618	3.48344	0.000495012	0.0380333	yes
XLOC_002560	Lrriq1	High	Low	OK	1.6547	5.14814	1.63748	-3.63691	0.000275927	0.0269665	yes
XLOC_002726	na	High	Low	OK	2.13425	7.34628	1.78329	-3.7199	0.000199298	0.0215755	yes
XLOC_003003	Smek2	High	Low	OK	3.96179	11.4121	1.52634	-3.54499	0.000392634	0.0328029	yes
XLOC_003004	Ccdc88a	High	Low	OK	3.63893	12.8066	1.8153	-4.36922	1.2469e-05	0.00315971	yes
XLOC_003017	Hba-a1,Hba-a2	High	Low	OK	36.532	4.88919	-2.90149	4.96081	7.01986e-07	0.000323145	yes
XLOC_003019	Hba-a1,Hba-a2	High	Low	OK	22.8767	3.07315	-2.89609	5.03566	4.76216e-07	0.000242403	yes
XLOC_003193	Mfap4	High	Low	OK	4.53342	1.07392	-2.07771	3.54442	0.000393484	0.0328036	yes
XLOC_003358	Rnmtl1	High	Low	OK	3.48238	0.829403	-2.06993	3.43283	0.000597326	0.0418825	yes
XLOC_003479	C030037D09Rik	High	Low	OK	11.8334	47.2963	1.99886	-3.68678	0.000227113	0.0235282	yes
XLOC_004295	Ankfn1	High	Low	OK	0.118801	1.15868	3.28586	-3.60606	0.000310886	0.0290904	yes
XLOC_004302	Nme2	High	Low	OK	140.966	43.1468	-1.70802	3.59377	0.000325933	0.0299033	yes
XLOC_004356	Arl5c	High	Low	OK	0.236795	1.67573	2.82308	-3.45309	0.000554203	0.0398768	yes
XLOC_004479	Gfap	High	Low	OK	2.83054	0.222019	-3.67232	5.37533	7.64442e-08	5.46865e-05	yes
XLOC_004667	na	High	Low	OK	8.70606	0.44791	-4.28074	3.39016	0.000698522	0.0464552	yes
XLOC_004668	na	High	Low	OK	9.93148	0.792493	-3.64754	4.93129	8.16865e-07	0.000363388	yes
XLOC_004669	na	High	Low	OK	30.8327	0	-1.79769e+308	-1.79769e+308	0.000157029	0.0184319	yes
XLOC_004671	na	High	Low	OK	3.13444	0.100819	-4.95837	3.47158	0.000517408	0.0389032	yes
XLOC_004736	na	High	Low	OK	12.1193	0.38445	-4.97836	5.56038	2.69182e-08	2.37499e-05	yes
XLOC_004769	na	High	Low	OK	9.72409	26.8911	1.46749	-3.468	0.000524353	0.039041	yes
XLOC_004778	na	High	Low	OK	10.3156	0	-1.79769e+308	-1.79769e+308	0.000572364	0.0405078	yes
XLOC_004823	na	High	Low	OK	0.178087	1.38148	2.95557	-3.9306	8.47348e-05	0.012565	yes
XLOC_004824	na	High	Low	OK	0.169401	1.05122	2.63355	-3.45627	0.000547705	0.0396896	yes
XLOC_004914	5730507C01Rik	High	Low	OK	0.674389	3.05825	2.18105	-3.53048	0.000414805	0.0339513	yes
XLOC_004950	Snx13	High	Low	OK	2.4011	6.95339	1.53402	-3.4391	0.000583642	0.0410784	yes
XLOC_004966	Pnpla8	High	Low	OK	5.80047	17.6168	1.60271	-3.77753	0.000158391	0.0185191	yes
XLOC_004975	Arhgap5	High	Low	OK	2.72321	12.6519	2.21597	-4.90939	9.13616e-07	0.000393211	yes
XLOC_005095	na	High	Low	OK	4.7567	18.9716	1.99581	-4.06645	4.77343e-05	0.00825803	yes
XLOC_005119	Fos	High	Low	OK	0.22739	2.02966	3.158	-4.23345	2.30129e-05	0.00493222	yes
XLOC_005508	0610009B14Rik	High	Low	OK	13.1192	3.13763	-2.06393	3.95143	7.76844e-05	0.0118597	yes
XLOC_005783	na	High	Low	OK	7.31847	0.763847	-3.26019	4.34912	1.36686e-05	0.00333452	yes
XLOC_005860	na	High	Low	OK	4.66963	0.519193	-3.16896	3.86864	0.000109444	0.0146266	yes
XLOC_005862	na	High	Low	OK	20.5334	0.159977	-7.00396	4.75226	2.01153e-06	0.000749904	yes
XLOC_005883	na	High	Low	OK	0.952343	7.67073	3.00981	-3.70173	0.000214135	0.0227172	yes
XLOC_006091	Nol8	High	Low	OK	10.5816	31.8878	1.59145	-3.80941	0.000139296	0.0170696	yes
XLOC_006330	Actn2	High	Low	OK	0.98052	5.38892	2.45838	-4.98533	6.18567e-07	0.000292372	yes
XLOC_006350	Txndc3	High	Low	OK	22.0062	65.4446	1.57236	-3.80301	0.000142947	0.0173221	yes
XLOC_006448	4930401O12Rik	High	Low	OK	1.92499	14.159	2.87879	-4.94542	7.59788e-07	0.000343775	yes
XLOC_006675	Atp6ap1l	High	Low	OK	1.71623	37.8016	4.46114	-8.1614	2.22045e-16	2.35092e-12	yes
XLOC_006701	Iqgap2	High	Low	OK	0.951109	3.02712	1.67027	-3.53839	0.000402569	0.0332987	yes
XLOC_006792	na	High	Low	OK	2.05231	79.9711	5.28416	-3.65111	0.000261114	0.025934	yes
XLOC_006793	na	High	Low	OK	0.772878	33.8552	5.45299	-3.7774	0.000158471	0.0185191	yes
XLOC_006794	na	High	Low	OK	0	8.79958	1.79769e+308	1.79769e+308	7.83905e-05	0.0118597	yes
XLOC_006796	na	High	Low	OK	0.274569	21.5156	6.29207	-7.40756	1.28564e-13	5.67159e-10	yes
XLOC_006801	na	High	Low	OK	25.3113	0	-1.79769e+308	-1.79769e+308	0.000136095	0.0168317	yes
XLOC_006888	na	High	Low	OK	0.277907	4.5971	4.04805	-3.75907	0.000170547	0.0193328	yes
XLOC_006916	na	High	Low	OK	2.24024	11.499	2.35978	-3.45403	0.000552285	0.0398322	yes
XLOC_006918	na	High	Low	OK	13.1896	60.9249	2.20763	-3.38285	0.000717382	0.0472384	yes
XLOC_006920	na	High	Low	OK	6.73867	32.1854	2.25587	-3.67976	0.000233454	0.024044	yes
XLOC_006945	na	High	Low	OK	0	28.1715	1.79769e+308	1.79769e+308	6.45009e-05	0.0103786	yes
XLOC_006946	na	High	Low	OK	0	41.6867	1.79769e+308	1.79769e+308	2.56541e-05	0.00518232	yes
XLOC_006994	Top2b	High	Low	OK	0.770285	2.70787	1.8137	-3.58405	0.000338302	0.0303636	yes
XLOC_007094	BC061237	High	Low	OK	10.9403	32.8523	1.58634	-3.55386	0.000379615	0.0322824	yes
XLOC_007317	4930529K09Rik	High	Low	OK	0.701223	5.90235	3.07334	-3.79194	0.000149477	0.0179028	yes
XLOC_007427	Plac9	High	Low	OK	16.4653	4.19098	-1.97407	3.58321	0.000339396	0.0304009	yes
XLOC_007429	Plac9	High	Low	OK	15.5585	3.32429	-2.22658	3.88372	0.000102872	0.0142189	yes
XLOC_007431	Plac9	High	Low	OK	14.6728	2.6129	-2.48942	4.16283	3.14332e-05	0.0059429	yes
XLOC_007493	Gm10377	High	Low	OK	26.1488	78.5356	1.5866	-3.77387	0.000160733	0.0187009	yes
XLOC_007494	Gm10377	High	Low	OK	22.1244	63.3632	1.51801	-3.57181	0.000354519	0.0309248	yes
XLOC_007495	1700001F09Rik	High	Low	OK	55.4465	163.145	1.55699	-3.79837	0.000145652	0.0174842	yes
XLOC_007722	Fndc3a	High	Low	OK	8.76955	23.1213	1.39865	-3.41372	0.000640819	0.0440567	yes
XLOC_007730	Lrrc63	High	Low	OK	23.4426	65.6429	1.48551	-3.38283	0.000717437	0.0472384	yes
XLOC_007737	4930444M15Rik	High	Low	OK	5.41079	1.43548	-1.91431	3.48794	0.000486755	0.0374837	yes
XLOC_007752	Lect1	High	Low	OK	4.81038	1.18754	-2.01817	3.51254	0.00044385	0.0352272	yes
XLOC_007820	na	High	Low	OK	0.948773	5.53859	2.54538	-3.63288	0.000280277	0.0273246	yes
XLOC_007833	na	High	Low	OK	0.524663	3.22246	2.6187	-3.58558	0.000336326	0.0303312	yes
XLOC_007910	na	High	Low	OK	61.1771	0	-1.79769e+308	-1.79769e+308	0.000759096	0.0488217	yes
XLOC_007912	na	High	Low	OK	7.50705	1.01272	-2.89001	3.49208	0.000479279	0.0370936	yes
XLOC_007982	na	High	Low	OK	46.3625	14.9364	-1.63412	3.52883	0.000417407	0.0340473	yes
XLOC_008040	Fyb	High	Low	OK	0.169365	1.98767	3.55287	-5.0508	4.39953e-07	0.000230232	yes
XLOC_008167	Ly6e	High	Low	OK	33.3796	9.97454	-1.74264	3.52763	0.000419302	0.0340968	yes
XLOC_008306	Ncaph2	High	Low	OK	58.0873	12.4926	-2.21714	3.92346	8.72879e-05	0.0127648	yes
XLOC_008347	Aqp2	High	Low	OK	18.5396	0.963365	-4.26638	7.37219	1.67866e-13	6.83575e-10	yes
XLOC_008366	na	High	Low	OK	9.43709	0.765704	-3.62348	5.09893	3.41583e-07	0.000184517	yes
XLOC_008424	Nipbl	High	Low	OK	8.13413	22.1873	1.44768	-3.3683	0.000756335	0.0488217	yes
XLOC_008432	Ttc23l	High	Low	OK	16.8564	45.244	1.42443	-3.4428	0.00057572	0.0406366	yes
XLOC_008566	Ly6d	High	Low	OK	8.35594	0.649435	-3.68554	4.96611	6.83107e-07	0.000317213	yes
XLOC_008718	Smc1b	High	Low	OK	7.52304	20.4348	1.44164	-3.47656	0.000507893	0.0386294	yes
XLOC_008893	na	High	Low	OK	3.51829	19.6931	2.48474	-3.39636	0.000682873	0.045778	yes
XLOC_008981	na	High	Low	OK	0.555025	7.21212	3.6998	-4.09796	4.16811e-05	0.00737965	yes
XLOC_009030	na	High	Low	OK	0	1.56502	1.79769e+308	1.79769e+308	0.000548808	0.0396896	yes
XLOC_009382	Mrap	High	Low	OK	6.74392	1.43469	-2.23285	3.86741	0.000109998	0.0146266	yes
XLOC_009440	AU021092	High	Low	OK	35.3117	8.8104	-2.00287	4.33397	1.46443e-05	0.00352381	yes
XLOC_009845	na	High	Low	OK	5.84956	0.485214	-3.59163	4.44106	8.9518e-06	0.0024811	yes
XLOC_009913	na	High	Low	OK	14.9228	64.3913	2.10934	-3.41926	0.000627911	0.0435083	yes
XLOC_009916	na	High	Low	OK	13.4214	61.1792	2.1885	-3.42657	0.000611249	0.0425767	yes
XLOC_009918	na	High	Low	OK	9.00042	47.6497	2.4044	-3.87203	0.000107934	0.0146206	yes
XLOC_009986	Ccr6	High	Low	OK	0.730465	4.91051	2.74899	-3.76835	0.000164333	0.018953	yes
XLOC_009995	1700110C19Rik	High	Low	OK	0	5.34771	1.79769e+308	1.79769e+308	7.98455e-05	0.0120423	yes
XLOC_010111	Igfals	High	Low	OK	0.0430179	1.84534	5.42281	-3.70378	0.000212415	0.0226116	yes
XLOC_010166	Rpl10a	High	Low	OK	363.125	118.264	-1.61845	3.92174	8.79111e-05	0.0128205	yes
XLOC_010191	Ubash3a	High	Low	OK	0.460875	13.8766	4.91214	-8.82097	0	0	yes
XLOC_010192	Slc37a1	High	Low	OK	2.17732	7.73536	1.82891	-3.77275	0.000161456	0.0187438	yes
XLOC_010494	Galm	High	Low	OK	24.6953	6.26661	-1.97848	4.59631	4.30042e-06	0.00133915	yes
XLOC_010558	Qk	High	Low	OK	7.73345	23.8591	1.62535	-3.57656	0.000348145	0.0307168	yes
XLOC_010565	Mas1	High	Low	OK	3.88825	16.6226	2.09595	-4.22326	2.40799e-05	0.00507358	yes
XLOC_010622	Zfp13	High	Low	OK	48.1391	15.0891	-1.6737	3.99324	6.51756e-05	0.0104554	yes
XLOC_010948	Dazl	High	Low	OK	8.63871	31.9207	1.8856	-4.41457	1.01213e-05	0.00267901	yes
XLOC_011011	Ankrd12	High	Low	OK	0.544131	2.01979	1.89218	-3.89085	9.98926e-05	0.0139897	yes
XLOC_011023	Emilin2	High	Low	OK	0.193073	3.22258	4.061	-6.56425	5.22948e-11	1.25836e-07	yes
XLOC_011056	Cdkl4	High	Low	OK	2.9219	9.91795	1.76314	-3.87641	0.000106009	0.0145386	yes
XLOC_011128	na	High	Low	OK	1.44994	5.49709	1.92268	-4.32208	1.54564e-05	0.00367982	yes
XLOC_011255	na	High	Low	OK	6.29094	1.62084	-1.95654	3.41581	0.000635925	0.0438341	yes
XLOC_011358	Egr1	High	Low	OK	1.17154	4.04866	1.78904	-3.49557	0.000473044	0.0368584	yes
XLOC_011448	Zfp474	High	Low	OK	20.7554	54.4262	1.39081	-3.39025	0.000698284	0.0464552	yes
XLOC_011512	Tubb6	High	Low	OK	7.90952	23.1426	1.54889	-3.61896	0.00029579	0.0282645	yes
XLOC_011580	Rock1	High	Low	OK	0.567511	3.01399	2.40895	-4.62763	3.69874e-06	0.00121617	yes
XLOC_011606	4921528I01Rik	High	Low	OK	4.8817	17.7524	1.86256	-4.35138	1.35282e-05	0.00331553	yes
XLOC_011727	A530050N04Rik	High	Low	OK	3.35856	0.123116	-4.76975	3.70342	0.000212713	0.0226116	yes
XLOC_011817	na	High	Low	OK	846.289	178.726	-2.2434	3.581	0.000342278	0.0305452	yes
XLOC_011821	na	High	Low	OK	0.683406	5.99135	3.13207	-3.87008	0.000108799	0.0146266	yes
XLOC_011928	na	High	Low	OK	0.178053	4.8496	4.76749	-5.67949	1.35095e-08	1.37584e-05	yes
XLOC_012159	A1cf	High	Low	OK	2.34987	0.419249	-2.4867	4.18972	2.79304e-05	0.00553775	yes
XLOC_012171	Ifit3	High	Low	OK	1.27653	0.115481	-3.46651	3.44723	0.000566357	0.0403524	yes
XLOC_012322	Ndufs8	High	Low	OK	79.1776	28.1503	-1.49194	3.60999	0.000306213	0.0290175	yes
XLOC_012374	Malat1	High	Low	OK	4.9135	13.239	1.42997	-3.42778	0.000608546	0.0424443	yes
XLOC_012442	Pga5	High	Low	OK	0.775514	100.682	7.02044	-7.98363	1.33227e-15	1.17546e-11	yes
XLOC_012500	Vps13a	High	Low	OK	2.88618	9.31166	1.68988	-4.05268	5.0635e-05	0.00853667	yes
XLOC_012537	Ranbp6	High	Low	OK	3.90577	10.7949	1.46667	-3.38637	0.00070825	0.0468836	yes
XLOC_012659	Afap1l2	High	Low	OK	1.45347	0.110584	-3.71629	4.67171	2.98708e-06	0.00101365	yes
XLOC_012699	na	High	Low	OK	4.4478	0.150935	-4.88109	3.47456	0.000511697	0.0387217	yes
XLOC_012705	na	High	Low	OK	7.14139	47.7224	2.74039	-3.78392	0.000154375	0.0182596	yes
XLOC_012708	na	High	Low	OK	4.14687	30.6528	2.88592	-4.30344	1.68169e-05	0.00393917	yes
XLOC_012712	na	High	Low	OK	6.66408	0	-1.79769e+308	-1.79769e+308	7.80818e-05	0.0118597	yes
XLOC_012782	na	High	Low	OK	165.784	40.7773	-2.02347	4.51055	6.46601e-06	0.00186635	yes
XLOC_012784	na	High	Low	OK	94.379	23.0683	-2.03256	3.6944	0.000220406	0.0232899	yes
XLOC_012913	Fam69b	High	Low	OK	18.4598	6.20496	-1.57289	3.56847	0.000359071	0.0310865	yes
XLOC_012963	Ass1	High	Low	OK	20.5477	6.48647	-1.66347	3.64811	0.000264177	0.0261891	yes
XLOC_013051	Rif1	High	Low	OK	2.24662	8.65248	1.94536	-4.2964	1.73593e-05	0.00395216	yes
XLOC_013057	4930555B11Rik	High	Low	OK	2.0576	0	-1.79769e+308	-1.79769e+308	0.000438136	0.0349308	yes
XLOC_013349	Casc5	High	Low	OK	0.313662	1.35604	2.11211	-3.63097	0.000282357	0.0274265	yes
XLOC_013470	Plcb4	High	Low	OK	0.72277	2.71927	1.91161	-3.62433	0.000289712	0.0278891	yes
XLOC_013943	Lcn2	High	Low	OK	270.491	81.0296	-1.73906	4.24016	2.23361e-05	0.00482623	yes
XLOC_014020	BB557941	High	Low	OK	7.4711	0	-1.79769e+308	-1.79769e+308	2.57462e-05	0.00518232	yes
XLOC_014089	Cwc22	High	Low	OK	6.21278	1.5212	-2.03003	4.32004	1.56004e-05	0.00368685	yes
XLOC_014330	4930430A15Rik	High	Low	OK	5.74025	16.8985	1.55771	-3.43012	0.000603325	0.0421913	yes
XLOC_014355	Ryr3	High	Low	OK	1.01238	0.14603	-2.79342	5.26606	1.39382e-07	8.99831e-05	yes
XLOC_014670	Ptgis	High	Low	OK	11.1117	3.75263	-1.56611	3.40531	0.000660889	0.044854	yes
XLOC_014720	Sycp2	High	Low	OK	5.82735	17.3482	1.57387	-3.56103	0.000369396	0.0316938	yes
XLOC_014734	Nkain4	High	Low	OK	5.72996	0.429571	-3.73756	4.24647	2.17162e-05	0.00473091	yes
XLOC_014789	na	High	Low	OK	1.54815	13.3023	3.10306	-5.10302	3.34279e-07	0.000182434	yes
XLOC_014792	na	High	Low	OK	0.335581	13.3104	5.30974	-4.06985	4.70431e-05	0.00816513	yes
XLOC_014794	na	High	Low	OK	0.068207	5.56171	6.34946	-4.36209	1.28824e-05	0.00320853	yes
XLOC_014838	na	High	Low	OK	0.208864	1.99597	3.25645	-4.75692	1.9657e-06	0.000738016	yes
XLOC_014840	na	High	Low	OK	1.92561	8.3954	2.12428	-5.01896	5.19529e-07	0.000254656	yes
XLOC_014876	na	High	Low	OK	9.38151	39.5869	2.07713	-3.47171	0.000517157	0.0389032	yes
XLOC_014879	na	High	Low	OK	7.17094	38.9717	2.44219	-3.93871	8.19205e-05	0.0123202	yes
XLOC_014998	na	High	Low	OK	0	8.65575	1.79769e+308	1.79769e+308	0.000101019	0.014073	yes
XLOC_015025	na	High	Low	OK	8.22864	0.090848	-6.50105	4.4015	1.07505e-05	0.00280349	yes
XLOC_015071	Lrrcc1	High	Low	OK	13.4314	47.2449	1.81454	-4.10118	4.11052e-05	0.00735857	yes
XLOC_015193	Kcnab1	High	Low	OK	0.289633	2.25106	2.9583	-3.61522	0.000300087	0.028572	yes
XLOC_015204	Smc4	High	Low	OK	16.3867	60.2122	1.87753	-4.53954	5.63783e-06	0.00168619	yes
XLOC_015529	Cenpe	High	Low	OK	1.99387	6.56626	1.7195	-4.05041	5.11276e-05	0.00859236	yes
XLOC_015591	Lrriq3	High	Low	OK	11.7604	35.524	1.59486	-3.83057	0.000127846	0.0163082	yes
XLOC_015657	Ccdc39	High	Low	OK	2.98262	10.4125	1.80367	-3.37267	0.00074443	0.0482949	yes
XLOC_015686	Sclt1	High	Low	OK	12.6245	33.8824	1.42431	-3.46339	0.000533421	0.0391654	yes
XLOC_015796	Fcrls	High	Low	OK	1.28771	0	-1.79769e+308	-1.79769e+308	0.000268289	0.02642	yes
XLOC_015804	Apoa1bp	High	Low	OK	109.312	37.1873	-1.55557	3.76242	0.000168279	0.0191991	yes
XLOC_015963	Sycp1	High	Low	OK	3.54969	13.4456	1.92136	-4.09375	4.24446e-05	0.00748978	yes
XLOC_016056	Fnbp1l	High	Low	OK	1.98173	6.56483	1.72799	-3.76418	0.000167097	0.0191883	yes
XLOC_016236	na	High	Low	OK	3.64166	49.5478	3.76615	-3.4702	0.000520078	0.0389639	yes
XLOC_016521	Ugcg	High	Low	OK	1.15184	4.17279	1.85708	-3.46913	0.000522149	0.0389866	yes
XLOC_016556	Cntln	High	Low	OK	1.46637	4.83452	1.72113	-3.72635	0.000194274	0.0211659	yes
XLOC_016758	Epha10	High	Low	OK	7.17243	2.24483	-1.67585	3.84569	0.000120214	0.0154839	yes
XLOC_016807	Laptm5	High	Low	OK	6.53822	1.6593	-1.97832	3.9135	9.09677e-05	0.0131575	yes
XLOC_016856	E2f2	High	Low	OK	2.06232	0.337474	-2.61142	4.53163	5.85308e-06	0.00174073	yes
XLOC_016862	Luzp1	High	Low	OK	11.6481	36.7023	1.65578	-4.03032	5.57006e-05	0.00918591	yes
XLOC_016995	Mmel1	High	Low	OK	15.8753	48.1829	1.60174	-3.91059	9.20711e-05	0.0132447	yes
XLOC_017042	4930448K20Rik	High	Low	OK	8.9155	29.2526	1.71418	-3.88509	0.000102292	0.0141898	yes
XLOC_017185	Abca1	High	Low	OK	0.825162	3.76253	2.18895	-4.45356	8.44567e-06	0.00239089	yes
XLOC_017230	Zfp37	High	Low	OK	8.74415	29.9979	1.77847	-4.29667	1.7338e-05	0.00395216	yes
XLOC_017479	Gjb3	High	Low	OK	10.6688	1.18072	-3.17566	4.95072	7.39396e-07	0.000337432	yes
XLOC_017593	Ubxn10	High	Low	OK	40.8123	113.519	1.47586	-3.55952	0.000371538	0.0318232	yes
XLOC_017748	na	High	Low	OK	0.176627	11.8849	6.07227	-4.32345	1.53611e-05	0.00367958	yes
XLOC_017791	na	High	Low	OK	2.29422	9.38111	2.03176	-3.98132	6.85336e-05	0.010895	yes
XLOC_017810	na	High	Low	OK	0.609101	5.54373	3.1861	-3.47439	0.000512017	0.0387217	yes
XLOC_017831	na	High	Low	OK	19.3833	79.0651	2.02823	-3.40446	0.000662938	0.0449355	yes
XLOC_017863	na	High	Low	OK	26.571	0	-1.79769e+308	-1.79769e+308	0.000644562	0.0441993	yes
XLOC_017872	na	High	Low	OK	1.1069	9.46831	3.09658	-3.82061	0.000133124	0.0167068	yes
XLOC_017873	na	High	Low	OK	1.22537	8.97492	2.87268	-4.7775	1.7749e-06	0.000685836	yes
XLOC_017881	na	High	Low	OK	12.1869	0	-1.79769e+308	-1.79769e+308	6.45963e-06	0.00186635	yes
XLOC_017884	na	High	Low	OK	5.5564	33.245	2.58092	-3.54099	0.000398634	0.0330766	yes
XLOC_017896	na	High	Low	OK	44.9469	0	-1.79769e+308	-1.79769e+308	0.000657901	0.0447692	yes
XLOC_017903	na	High	Low	OK	4.15576	0	-1.79769e+308	-1.79769e+308	5.86602e-05	0.00955493	yes
XLOC_018022	Sema3c	High	Low	OK	0.48009	1.82394	1.92568	-3.368	0.000757166	0.0488217	yes
XLOC_018052	Galntl5	High	Low	OK	84.0188	231.409	1.46166	-3.55338	0.000380308	0.0322824	yes
XLOC_018452	Orai1	High	Low	OK	32.5908	8.23324	-1.98493	4.65078	3.30685e-06	0.00110796	yes
XLOC_018578	Elfn1	High	Low	OK	2.68529	7.71884	1.5233	-3.48772	0.000487151	0.0374837	yes
XLOC_018796	Bod1l	High	Low	OK	0.499527	1.53044	1.61532	-3.42822	0.000607557	0.0424312	yes
XLOC_018986	Gfi1	High	Low	OK	1.73216	0.390624	-2.14872	3.46372	0.000532755	0.0391654	yes
XLOC_019278	Rnf6	High	Low	OK	10.9204	3.39028	-1.68755	3.57864	0.000345385	0.0306778	yes
XLOC_019301	na	High	Low	OK	0.448783	34.5492	6.26649	-6.14794	7.84937e-10	1.539e-06	yes
XLOC_019401	na	High	Low	OK	0	14.6844	1.79769e+308	1.79769e+308	2.93879e-05	0.00572061	yes
XLOC_019431	na	High	Low	OK	0.603042	4.82796	3.00108	-3.45712	0.000545989	0.0396896	yes
XLOC_019578	na	High	Low	OK	0.40217	3.2026	2.99337	-3.98608	6.71737e-05	0.010711	yes
XLOC_019612	na	High	Low	OK	0.223576	5.32511	4.57398	-4.28785	1.80412e-05	0.00402981	yes
XLOC_019620	na	High	Low	OK	21.9253	3.00248	-2.86837	3.46614	0.000527982	0.0391654	yes
XLOC_019902	Sftpb	High	Low	OK	0.327446	4.10905	3.64947	-4.42901	9.46665e-06	0.00258323	yes
XLOC_019907	Capg	High	Low	OK	2.31431	0.365329	-2.66331	3.38208	0.000719387	0.0472493	yes
XLOC_020201	Ptpro	High	Low	OK	0.209098	1.63464	2.96672	-3.49263	0.000478295	0.0370717	yes
XLOC_020228	Rassf8	High	Low	OK	2.08928	0.334778	-2.64173	3.86626	0.000110519	0.0146266	yes
XLOC_020609	Tmf1	High	Low	OK	8.21654	38.1698	2.21583	-5.38087	7.41285e-08	5.37563e-05	yes
XLOC_020901	na	High	Low	OK	1.37809	8.8007	2.67495	-5.02598	5.00878e-07	0.000247808	yes
XLOC_020915	na	High	Low	OK	7.18699	2.38442	-1.59175	3.8205	0.00013318	0.0167068	yes
XLOC_020919	na	High	Low	OK	0.620562	5.83874	3.23401	-3.60973	0.000306521	0.0290175	yes
XLOC_020932	na	High	Low	OK	2.91486	0.424112	-2.78091	3.69439	0.000220414	0.0232899	yes
XLOC_020936	na	High	Low	OK	10.2906	0.707494	-3.86247	3.5213	0.000429437	0.0346548	yes
XLOC_020981	na	High	Low	OK	6.51445	78.664	3.59399	-5.74193	9.36049e-09	1.07723e-05	yes
XLOC_020982	na	High	Low	OK	0.718901	11.9808	4.05878	-3.76903	0.000163881	0.0189422	yes
XLOC_021044	na	High	Low	OK	0	4.15209	1.79769e+308	1.79769e+308	0.000332935	0.0301423	yes
XLOC_021431	Klk1b27	High	Low	OK	3.92304	0.532749	-2.88045	3.76304	0.000167863	0.0191929	yes
XLOC_021994	Drd4	High	Low	OK	13.3149	3.06758	-2.11787	4.29744	1.7278e-05	0.00395216	yes
XLOC_022209	Apoc2	High	Low	OK	0.474324	7.18145	3.92033	-4.36912	1.24746e-05	0.00315971	yes
XLOC_022294	Atp1a3	High	Low	OK	1.29059	0.174722	-2.8849	4.27814	1.88463e-05	0.00419195	yes
XLOC_022708	Thrsp	High	Low	OK	5.27621	1.15357	-2.1934	3.6531	0.000259089	0.0258756	yes
XLOC_022793	Hbb-b1,Hbb-b2	High	Low	OK	19.5907	1.19305	-4.03744	5.23819	1.62156e-07	0.000102193	yes
XLOC_022794	Beta-s	High	Low	OK	38.8201	5.8588	-2.72813	5.4107	6.2779e-08	4.73339e-05	yes
XLOC_023206	na	High	Low	OK	0.534932	2.88509	2.43119	-4.17103	3.03232e-05	0.00578172	yes
XLOC_023208	na	High	Low	OK	2.7786	8.61883	1.63313	-3.85229	0.000117019	0.015258	yes
XLOC_023327	na	High	Low	OK	4.13279	1.07956	-1.93668	3.4388	0.000584307	0.0410784	yes
XLOC_023328	na	High	Low	OK	10.2135	1.15816	-3.14058	5.45774	4.82233e-08	3.86795e-05	yes
XLOC_023431	na	High	Low	OK	37.0687	0.641448	-5.85273	9.1075	0	0	yes
XLOC_023571	Defb14	High	Low	OK	20.6355	3.91835	-2.39681	3.59004	0.000330631	0.0301423	yes
XLOC_023673	Adam24	High	Low	OK	10.389	29.5848	1.5098	-3.60759	0.000309054	0.0290753	yes
XLOC_023674	Adam25	High	Low	OK	6.77877	18.5503	1.45235	-3.36699	0.000759928	0.0488217	yes
XLOC_023680	Pcm1	High	Low	OK	5.44147	14.2089	1.38472	-3.3692	0.000753854	0.0488217	yes
XLOC_023731	1700125H03Rik	High	Low	OK	0.315774	17.7437	5.81227	-4.57966	4.65739e-06	0.00141697	yes
XLOC_023851	Klf1	High	Low	OK	3.41171	0.239142	-3.83456	5.17766	2.24691e-07	0.000130113	yes
XLOC_024057	Cpne7	High	Low	OK	0.14089	1.69486	3.58852	-4.50225	6.72379e-06	0.00192402	yes
XLOC_024251	Adam26a	High	Low	OK	3.27984	11.3369	1.78932	-3.81532	0.000136007	0.0168317	yes
XLOC_024283	Galntl6	High	Low	OK	1.67844	8.2704	2.30083	-3.75553	0.000172977	0.0194708	yes
XLOC_024740	na	High	Low	OK	1.40708	21.5195	3.93487	-5.62368	1.86936e-08	1.78344e-05	yes
XLOC_024823	na	High	Low	OK	0.389163	3.11969	3.00295	-3.6933	0.000221366	0.023344	yes
XLOC_024862	na	High	Low	OK	4.81123	24.0092	2.31911	-3.72578	0.000194714	0.0211659	yes
XLOC_024966	Icam5	High	Low	OK	5.44865	1.81918	-1.58261	3.368	0.000757161	0.0488217	yes
XLOC_025298	Zfp280d	High	Low	OK	1.23753	4.87603	1.97824	-4.04348	5.26641e-05	0.00879473	yes
XLOC_025319	4933433G15Rik	High	Low	OK	15.5588	1.88614	-3.04422	5.68907	1.27735e-08	1.35241e-05	yes
XLOC_025529	Golga4	High	Low	OK	6.68768	18.0636	1.4335	-3.50298	0.000460088	0.0362983	yes
XLOC_025569	Kif15	High	Low	OK	1.91301	5.59207	1.54754	-3.4502	0.000560175	0.0401279	yes
XLOC_025595	AK129341	High	Low	OK	10.066	31.3565	1.63928	-3.97511	7.03473e-05	0.0111186	yes
XLOC_026243	na	High	Low	OK	0	4.8197	1.79769e+308	1.79769e+308	0.00062732	0.0435083	yes
XLOC_026244	na	High	Low	OK	0	2.31698	1.79769e+308	1.79769e+308	2.25848e-05	0.00486013	yes
XLOC_026314	na	High	Low	OK	4.40553	13.1192	1.5743	-3.41687	0.000633466	0.0438129	yes
XLOC_026371	na	High	Low	OK	72.2029	22.7387	-1.66691	3.96736	7.26725e-05	0.0114158	yes
XLOC_026376	na	High	Low	OK	65.1961	24.6719	-1.40192	3.40889	0.000652268	0.0445322	yes
XLOC_026398	Gm14347	High	Low	OK	0.369827	2.17877	2.55859	-3.40868	0.000652782	0.0445322	yes
XLOC_026718	1700011M02Rik	High	Low	OK	55.4067	19.3277	-1.51939	3.36229	0.000772986	0.0494804	yes
XLOC_026745	Fam46d	High	Low	OK	1.46164	8.84104	2.59663	-4.92638	8.37661e-07	0.000369534	yes
XLOC_026752	Cylc1	High	Low	OK	7.23414	23.2223	1.68262	-3.87209	0.000107904	0.0146206	yes
XLOC_026768	Gm382	High	Low	OK	0.553734	2.15993	1.96372	-3.39772	0.000679511	0.0457077	yes
XLOC_026786	Gm5128	High	Low	OK	1.01299	3.73289	1.88168	-3.504	0.000458333	0.0362138	yes
XLOC_027272	Hmgn5	High	Low	OK	0.434741	2.28949	2.39679	-3.72886	0.000192346	0.0211068	yes
XLOC_027281	4932411N23Rik	High	Low	OK	0.471366	2.09555	2.15241	-3.50215	0.000461521	0.0363572	yes
XLOC_027327	Irs4	High	Low	OK	1.24239	0.294137	-2.07855	3.58872	0.000332308	0.0301423	yes
XLOC_027416	na	High	Low	OK	1207.63	0	-1.79769e+308	-1.79769e+308	0.000533163	0.0391654	yes
XLOC_027429	na	High	Low	OK	1.71984	5.18628	1.59243	-3.45251	0.000555406	0.0398943	yes
XLOC_000005	Rb1cc1	High	Control	OK	9.17517	38.5278	2.07009	-5.02783	4.96053e-07	0.000247737	yes
XLOC_000101	Col3a1	High	Control	OK	1.01258	5.69332	2.49124	-5.3611	8.27149e-08	5.6867e-05	yes
XLOC_000124	Sgol2	High	Control	OK	2.11605	7.21851	1.77033	-3.55323	0.000380524	0.0322824	yes
XLOC_000207	Des	High	Control	OK	4.12456	1.23659	-1.73787	3.41337	0.000641651	0.0440567	yes
XLOC_000433	Tpr	High	Control	OK	2.9527	8.31746	1.49411	-3.44797	0.000564823	0.0403517	yes
XLOC_000655	Arfgef1	High	Control	OK	5.20841	13.9216	1.41841	-3.4319	0.000599362	0.0419696	yes
XLOC_000691	Fam135a	High	Control	OK	5.99439	18.0568	1.59086	-3.83618	0.000124961	0.0159787	yes
XLOC_000778	Hspd1	High	Control	OK	6.27357	18.9474	1.59464	-3.65686	0.000255328	0.0256882	yes
XLOC_000847	Fev	High	Control	OK	9.07839	2.68533	-1.75734	3.49534	0.000473454	0.0368584	yes
XLOC_001070	Dhx9	High	Control	OK	6.135	19.8564	1.69447	-4.05481	5.01746e-05	0.00849895	yes
XLOC_001105	AI848100	High	Control	OK	12.4163	32.3672	1.3823	-3.37974	0.000725555	0.047419	yes
XLOC_001110	Prrc2c	High	Control	OK	1.40258	3.94306	1.49124	-3.47618	0.000508608	0.0386294	yes
XLOC_001241	Mosc2	High	Control	OK	52.681	14.5128	-1.85996	4.43935	9.02306e-06	0.00248783	yes
XLOC_001255	Cenpf	High	Control	OK	1.93933	6.05344	1.6422	-3.92945	8.51397e-05	0.0125897	yes
XLOC_001366	na	High	Control	OK	54.5137	272.206	2.32001	-3.95885	7.53125e-05	0.0115796	yes
XLOC_001372	na	High	Control	OK	2.28729	9.41074	2.04067	-4.62382	3.76734e-06	0.00122353	yes
XLOC_001382	na	High	Control	OK	6.01145	27.3511	2.18582	-5.27376	1.33657e-07	8.95639e-05	yes
XLOC_001486	na	High	Control	OK	1.32915	7.20846	2.43919	-3.46554	0.000529174	0.0391654	yes
XLOC_001503	na	High	Control	OK	6.74174	32.0931	2.25107	-3.60701	0.000309746	0.0290753	yes
XLOC_001505	na	High	Control	OK	4.10219	35.0115	3.09336	-3.81205	0.000137818	0.0169276	yes
XLOC_001507	na	High	Control	OK	6.37483	48.8396	2.93759	-3.59611	0.000323009	0.029842	yes
XLOC_001510	na	High	Control	OK	3.29096	58.3455	4.14804	-3.85588	0.000115313	0.0150728	yes
XLOC_001515	na	High	Control	OK	1.18303	7.35028	2.63531	-3.77443	0.000160376	0.0187005	yes
XLOC_001543	na	High	Control	OK	24.0011	89.707	1.90212	-3.68731	0.00022664	0.0235282	yes
XLOC_001568	na	High	Control	OK	0.907686	5.99492	2.72348	-3.41432	0.000639411	0.0440171	yes
XLOC_001614	na	High	Control	OK	12.4648	0	-1.79769e+308	-1.79769e+308	9.14401e-05	0.0131898	yes
XLOC_001626	na	High	Control	OK	214.458	61.8444	-1.79398	4.17377	2.99595e-05	0.00576881	yes
XLOC_001649	Shprh	High	Control	OK	0.348684	1.46164	2.0676	-3.58811	0.000333087	0.0301423	yes
XLOC_001758	Ascc3	High	Control	OK	2.13356	6.0945	1.51425	-3.49997	0.000465311	0.0364388	yes
XLOC_001778	Gcc2	High	Control	OK	0.891141	2.71135	1.60529	-3.40311	0.000666226	0.0451006	yes
XLOC_001780	Ranbp2	High	Control	OK	2.34901	7.16551	1.60902	-3.80028	0.000144533	0.0173893	yes
XLOC_001819	Jmjd1c	High	Control	OK	1.42842	4.4661	1.64459	-3.63676	0.000276094	0.0269665	yes
XLOC_002000	Anks1b	High	Control	OK	2.04686	0.165986	-3.62428	5.17647	2.26121e-07	0.000130113	yes
XLOC_002007	Ccdc38	High	Control	OK	24.7151	73.0795	1.56407	-3.58764	0.000333683	0.0301442	yes
XLOC_002019	Eea1	High	Control	OK	0.434021	1.74702	2.00906	-3.93445	8.33862e-05	0.0124346	yes
XLOC_002033	Kitl	High	Control	OK	0.556004	2.33388	2.06956	-3.68135	0.000232004	0.0239412	yes
XLOC_002142	Ankrd52	High	Control	OK	0.493562	1.81542	1.879	-3.67795	0.00023512	0.0241216	yes
XLOC_002226	Pde7b	High	Control	OK	7.38522	0.211376	-5.12676	7.84113	4.44089e-15	2.61213e-11	yes
XLOC_002560	Lrriq1	High	Control	OK	1.6547	5.5552	1.74727	-3.74276	0.000182011	0.0203276	yes
XLOC_002726	na	High	Control	OK	2.13425	7.02078	1.7179	-3.57661	0.000348083	0.0307168	yes
XLOC_002730	na	High	Control	OK	1.73696	20.7419	3.57791	-5.83907	5.24941e-09	6.94734e-06	yes
XLOC_002835	na	High	Control	OK	0.389398	2.75949	2.82508	-4.61262	3.97625e-06	0.00125294	yes
XLOC_002970	Vstm2a	High	Control	OK	8.91263	0.140095	-5.99137	5.35428	8.58981e-08	5.82984e-05	yes
XLOC_002989	Usp34	High	Control	OK	4.13673	13.5466	1.71137	-3.62382	0.000290281	0.0278891	yes
XLOC_003003	Smek2	High	Control	OK	3.96179	13.4778	1.76636	-4.11852	3.81318e-05	0.00696077	yes
XLOC_003004	Ccdc88a	High	Control	OK	3.63893	14.1623	1.96047	-4.71806	2.381e-06	0.000851657	yes
XLOC_003030	Pank3	High	Control	OK	1.1062	3.6989	1.74148	-3.62427	0.000289781	0.0278891	yes
XLOC_003063	Zfp62	High	Control	OK	1.70972	6.45573	1.91682	-4.03363	5.49225e-05	0.00914305	yes
XLOC_003167	Mrpl55	High	Control	OK	93.7936	35.34	-1.40819	3.3784	0.000729099	0.0475583	yes
XLOC_003188	Dhrs7b	High	Control	OK	27.9494	7.87832	-1.82686	3.84849	0.000118848	0.0153829	yes
XLOC_003312	P2rx5	High	Control	OK	0.315428	5.60877	4.1523	-6.39158	1.64184e-10	3.62149e-07	yes
XLOC_003359	Timm22	High	Control	OK	13.5994	4.42526	-1.6197	3.37281	0.000744047	0.0482949	yes
XLOC_003416	Ccl8	High	Control	OK	9.40797	1.97906	-2.24907	3.45609	0.000548066	0.0396896	yes
XLOC_003497	Col1a1	High	Control	OK	0.965167	5.64445	2.54798	-5.39896	6.70266e-08	4.92813e-05	yes
XLOC_003513	Gip	High	Control	OK	7.13304	0	-1.79769e+308	-1.79769e+308	5.73948e-05	0.00943591	yes
XLOC_003590	Hspb9	High	Control	OK	3383.35	922.9	-1.87421	3.93523	8.31159e-05	0.0124293	yes
XLOC_003613	Tmem106a	High	Control	OK	6.50884	2.09391	-1.6362	3.38224	0.000718986	0.0472493	yes
XLOC_003900	Fbll1	High	Control	OK	7.49	2.27226	-1.72084	3.44845	0.000563808	0.0403336	yes
XLOC_004197	Taok1	High	Control	OK	1.55823	4.465	1.51875	-3.49758	0.000469504	0.0366587	yes
XLOC_004261	Usp32	High	Control	OK	9.10442	23.6059	1.37451	-3.36047	0.000778109	0.0496882	yes
XLOC_004316	Gm11545	High	Control	OK	0.128148	1.24869	3.28454	-3.8145	0.000136461	0.0168317	yes
XLOC_004479	Gfap	High	Control	OK	2.83054	0.190212	-3.8954	4.80234	1.56823e-06	0.000614956	yes
XLOC_004685	na	High	Control	OK	11.5544	0	-1.79769e+308	-1.79769e+308	0.000340394	0.0304388	yes
XLOC_004710	na	High	Control	OK	14.7718	4.9697	-1.57162	3.36097	0.000776688	0.0496574	yes
XLOC_004750	na	High	Control	OK	11.1787	121.798	3.44566	-3.78313	0.000154871	0.0182596	yes
XLOC_004778	na	High	Control	OK	10.3156	0	-1.79769e+308	-1.79769e+308	0.000572364	0.0405078	yes
XLOC_004813	na	High	Control	OK	0.516459	3.33872	2.69257	-3.54253	0.000396309	0.0329871	yes
XLOC_004819	na	High	Control	OK	1.60717	7.66174	2.25315	-5.00285	5.6488e-07	0.000271851	yes
XLOC_004821	na	High	Control	OK	0.465462	3.33275	2.83998	-3.47004	0.000520373	0.0389639	yes
XLOC_004823	na	High	Control	OK	0.178087	3.67653	4.36769	-6.01631	1.78437e-09	3.04713e-06	yes
XLOC_004824	na	High	Control	OK	0.169401	2.84133	4.06806	-5.57255	2.51043e-08	2.2525e-05	yes
XLOC_004846	na	High	Control	OK	11.0036	0.363233	-4.92093	5.36885	7.92382e-08	5.5772e-05	yes
XLOC_004900	Smc6	High	Control	OK	7.90714	25.6213	1.69612	-3.42197	0.0006217	0.0432478	yes
XLOC_004975	Arhgap5	High	Control	OK	2.72321	13.7766	2.33884	-4.92179	8.57581e-07	0.000375195	yes
XLOC_005024	Arid4a	High	Control	OK	0.65328	2.27222	1.79833	-3.60594	0.000311028	0.0290904	yes
XLOC_005095	na	High	Control	OK	4.7567	18.2687	1.94135	-3.95087	7.78668e-05	0.0118597	yes
XLOC_005176	Ppp4r4	High	Control	OK	4.13366	12.0417	1.54255	-3.46825	0.000523852	0.039041	yes
XLOC_005282	Amn	High	Control	OK	10.7647	3.35399	-1.68236	3.56819	0.000359452	0.0310865	yes
XLOC_005472	4930403N07Rik	High	Control	OK	6.63485	20.1088	1.59969	-3.59513	0.000324227	0.0298709	yes
XLOC_005508	0610009B14Rik	High	Control	OK	13.1192	2.55153	-2.36225	4.39093	1.12864e-05	0.00288639	yes
XLOC_005537	Pgf	High	Control	OK	7.04781	1.98844	-1.82554	3.64393	0.000268502	0.02642	yes
XLOC_005589	Trip11	High	Control	OK	0.724178	2.60826	1.84867	-3.88485	0.000102393	0.0141898	yes
XLOC_005607	Serpina1c	High	Control	OK	2.50135	0.42016	-2.5737	3.74923	0.000177375	0.0198518	yes
XLOC_005623	4933406K04Rik	High	Control	OK	9.76582	0.862094	-3.50182	4.72172	2.33863e-06	0.000842191	yes
XLOC_005642	Gm266	High	Control	OK	0.0943016	3.91237	5.37462	-3.66505	0.000247294	0.0251264	yes
XLOC_005713	na	High	Control	OK	0.80531	3.52201	2.12878	-3.83889	0.000123592	0.0158804	yes
XLOC_005753	na	High	Control	OK	1.1965	8.65451	2.85463	-3.78034	0.000156612	0.0184238	yes
XLOC_005814	na	High	Control	OK	4.38569	12.6489	1.52813	-3.37328	0.000742779	0.0482949	yes
XLOC_005823	na	High	Control	OK	3.44831	10.5715	1.61622	-3.90051	9.59898e-05	0.0136233	yes
XLOC_005859	na	High	Control	OK	4.22685	0.633221	-2.7388	3.70922	0.000207899	0.0222788	yes
XLOC_005860	na	High	Control	OK	4.66963	0.369978	-3.65779	3.90107	9.57674e-05	0.0136233	yes
XLOC_006042	Prpf4b	High	Control	OK	1.32775	4.18684	1.65688	-3.47122	0.000518092	0.0389032	yes
XLOC_006091	Nol8	High	Control	OK	10.5816	34.0965	1.68807	-3.81425	0.000136597	0.0168317	yes
XLOC_006330	Actn2	High	Control	OK	0.98052	3.51911	1.84359	-3.67892	0.000234223	0.0240763	yes
XLOC_006448	4930401O12Rik	High	Control	OK	1.92499	9.74143	2.33928	-3.97506	7.03602e-05	0.0111186	yes
XLOC_006660	Zfp72	High	Control	OK	0.568817	3.10888	2.45036	-3.50097	0.000463574	0.0364388	yes
XLOC_006794	na	High	Control	OK	0	7.44362	1.79769e+308	1.79769e+308	0.000131816	0.0166145	yes
XLOC_006796	na	High	Control	OK	0.274569	9.0942	5.0497	-5.87336	4.2705e-09	5.79671e-06	yes
XLOC_006801	na	High	Control	OK	25.3113	1.45805	-4.11767	3.72856	0.000192576	0.0211068	yes
XLOC_006861	na	High	Control	OK	33.7608	6.41044	-2.39685	4.6939	2.68051e-06	0.000927458	yes
XLOC_006888	na	High	Control	OK	0.277907	6.42322	4.53062	-4.2444	2.19175e-05	0.00475521	yes
XLOC_006920	na	High	Control	OK	6.73867	29.5716	2.13368	-3.46534	0.000529559	0.0391654	yes
XLOC_006928	na	High	Control	OK	0	4.12859	1.79769e+308	1.79769e+308	0.00063479	0.0438129	yes
XLOC_006943	na	High	Control	OK	8.82362	2.46661	-1.83884	3.65239	0.000259814	0.0258756	yes
XLOC_006945	na	High	Control	OK	0	22.4751	1.79769e+308	1.79769e+308	0.000128837	0.0163558	yes
XLOC_006946	na	High	Control	OK	0	33.0658	1.79769e+308	1.79769e+308	4.8535e-05	0.00833736	yes
XLOC_006994	Top2b	High	Control	OK	0.770285	3.60724	2.22743	-4.47366	7.68919e-06	0.00218844	yes
XLOC_007317	4930529K09Rik	High	Control	OK	0.701223	10.4789	3.90147	-4.93755	7.91109e-07	0.000354913	yes
XLOC_007722	Fndc3a	High	Control	OK	8.76955	24.2035	1.46464	-3.57341	0.000352366	0.0308834	yes
XLOC_007737	4930444M15Rik	High	Control	OK	5.41079	0.493475	-3.45479	5.26623	1.3925e-07	8.99831e-05	yes
XLOC_007768	Kctd12	High	Control	OK	0.986269	3.51922	1.8352	-3.73196	0.000189996	0.0210419	yes
XLOC_007833	na	High	Control	OK	0.524663	4.07041	2.95571	-4.0994	4.14231e-05	0.00735857	yes
XLOC_007867	na	High	Control	OK	1.67541	15.688	3.22707	-3.52227	0.000427875	0.0345815	yes
XLOC_007910	na	High	Control	OK	61.1771	0	-1.79769e+308	-1.79769e+308	0.000759096	0.0488217	yes
XLOC_007911	na	High	Control	OK	0	6.44929	1.79769e+308	1.79769e+308	0.000388572	0.0327044	yes
XLOC_007915	na	High	Control	OK	0.504681	3.26068	2.69173	-3.71633	0.000202137	0.0217676	yes
XLOC_008016	na	High	Control	OK	19.9095	6.49043	-1.61707	3.53225	0.000412033	0.0338641	yes
XLOC_008021	na	High	Control	OK	0	19.0485	1.79769e+308	1.79769e+308	0.00043722	0.0349308	yes
XLOC_008028	A630020A06	High	Control	OK	0.314451	1.6636	2.4034	-3.44573	0.000569516	0.0404685	yes
XLOC_008040	Fyb	High	Control	OK	0.169365	2.12122	3.64668	-5.20564	1.93327e-07	0.000113715	yes
XLOC_008233	Mgat3	High	Control	OK	1.2104	0.202851	-2.57699	3.9356	8.29881e-05	0.0124293	yes
XLOC_008306	Ncaph2	High	Control	OK	58.0873	12.4439	-2.22279	3.86302	0.000111995	0.0147483	yes
XLOC_008322	Arid2	High	Control	OK	10.1168	27.2473	1.42937	-3.49138	0.000480525	0.0371358	yes
XLOC_008347	Aqp2	High	Control	OK	18.5396	5.36061	-1.79014	3.8953	9.80769e-05	0.0138453	yes
XLOC_008354	Larp4	High	Control	OK	1.72622	6.30641	1.86921	-3.78365	0.000154547	0.0182596	yes
XLOC_008366	na	High	Control	OK	9.43709	1.7738	-2.4115	3.99758	6.39939e-05	0.0103575	yes
XLOC_008424	Nipbl	High	Control	OK	8.13413	27.6922	1.76742	-4.10351	4.06922e-05	0.00732709	yes
XLOC_008586	2410075B13Rik	High	Control	OK	11.1404	3.50858	-1.66683	3.52077	0.000430296	0.0346713	yes
XLOC_008633	Tst	High	Control	OK	38.3233	11.133	-1.78338	4.1221	3.75438e-05	0.00690102	yes
XLOC_008718	Smc1b	High	Control	OK	7.52304	20.9909	1.48037	-3.57176	0.000354591	0.0309248	yes
XLOC_008756	9430014N10Rik	High	Control	OK	0.361289	6.97505	4.27098	-4.43272	9.30512e-06	0.0025523	yes
XLOC_008926	na	High	Control	OK	9.55534	2.66607	-1.84159	3.80536	0.0001416	0.0172719	yes
XLOC_008940	na	High	Control	OK	5.26953	0.7384	-2.8352	4.54806	5.4142e-06	0.00162851	yes
XLOC_008955	na	High	Control	OK	1.24261	9.95435	3.00196	-5.4214	5.91342e-08	4.53688e-05	yes
XLOC_009003	na	High	Control	OK	0.428752	3.56406	3.05531	-3.76515	0.000166446	0.0191551	yes
XLOC_009043	na	High	Control	OK	19.2045	4.33897	-2.14602	3.71906	0.000199965	0.0216036	yes
XLOC_009075	na	High	Control	OK	0	2.72729	1.79769e+308	1.79769e+308	0.000388572	0.0327044	yes
XLOC_009197	Fetub	High	Control	OK	10.8631	1.13905	-3.25353	4.83596	1.32505e-06	0.000538421	yes
XLOC_009327	2610528E23Rik	High	Control	OK	9973.3	28568.9	1.5183	-3.691	0.000223378	0.0234329	yes
XLOC_009811	na	High	Control	OK	1.67504	22.6966	3.76021	-5.73361	9.83149e-09	1.10736e-05	yes
XLOC_009812	na	High	Control	OK	2.78581	11.625	2.06106	-3.89135	9.96873e-05	0.0139897	yes
XLOC_009813	na	High	Control	OK	5.14429	69.5056	3.75608	-7.49506	6.61693e-14	3.18443e-10	yes
XLOC_009814	na	High	Control	OK	5.08611	23.0887	2.18255	-3.80678	0.000140789	0.0172127	yes
XLOC_009815	na	High	Control	OK	8.15852	66.2688	3.02195	-5.26735	1.38403e-07	8.99831e-05	yes
XLOC_009816	na	High	Control	OK	9.70569	88.0258	3.18102	-5.88483	3.98471e-09	5.70115e-06	yes
XLOC_009818	na	High	Control	OK	12.104	54.8169	2.17913	-5.2302	1.69322e-07	0.000104228	yes
XLOC_009845	na	High	Control	OK	5.84956	0.806956	-2.85777	4.04397	5.25526e-05	0.00879473	yes
XLOC_009903	na	High	Control	OK	1.23124	6.89852	2.48617	-4.35998	1.30072e-05	0.00321764	yes
XLOC_009909	na	High	Control	OK	1.77596	8.9482	2.33299	-4.40931	1.03699e-05	0.00271764	yes
XLOC_009912	na	High	Control	OK	21.2887	86.2461	2.01837	-3.92799	8.56579e-05	0.0126311	yes
XLOC_009913	na	High	Control	OK	14.9228	67.6643	2.18087	-3.54509	0.000392473	0.0328029	yes
XLOC_009915	na	High	Control	OK	13.8948	60.7505	2.12835	-3.78592	0.00015314	0.018177	yes
XLOC_009916	na	High	Control	OK	13.4214	90.6059	2.75507	-4.39874	1.08879e-05	0.00282542	yes
XLOC_009918	na	High	Control	OK	9.00042	69.2227	2.94318	-4.81674	1.45922e-06	0.00057648	yes
XLOC_010109	4930528F23Rik	High	Control	OK	3.02248	9.79845	1.69682	-3.41069	0.000647986	0.0443766	yes
XLOC_010111	Igfals	High	Control	OK	0.0430179	1.75995	5.35446	-3.65364	0.000258549	0.0258735	yes
XLOC_010154	Itpr3	High	Control	OK	30.0682	1.27971	-4.55435	7.85049	4.21885e-15	2.61213e-11	yes
XLOC_010166	Rpl10a	High	Control	OK	363.125	109.27	-1.73256	4.19896	2.68143e-05	0.00537688	yes
XLOC_010191	Ubash3a	High	Control	OK	0.460875	2.45936	2.41584	-4.15459	3.25875e-05	0.00611744	yes
XLOC_010239	H2-Eb1	High	Control	OK	17.4809	4.85032	-1.84963	4.13647	3.52696e-05	0.00652832	yes
XLOC_010482	Birc6	High	Control	OK	0.692669	2.09113	1.59405	-3.5881	0.000333093	0.0301423	yes
XLOC_010558	Qk	High	Control	OK	7.73345	30.1034	1.96074	-4.25915	2.05208e-05	0.00450758	yes
XLOC_010608	na	High	Control	OK	7.55091	1.81271	-2.0585	3.87198	0.000107954	0.0146206	yes
XLOC_010622	Zfp13	High	Control	OK	48.1391	14.4072	-1.74042	3.91809	8.92546e-05	0.0129728	yes
XLOC_010657	Snhg9	High	Control	OK	57.382	10.1285	-2.50217	3.64728	0.000265031	0.0261934	yes
XLOC_010708	Rps10	High	Control	OK	510.639	187.262	-1.44725	3.50638	0.00045425	0.0359449	yes
XLOC_010784	H2-Aa	High	Control	OK	25.4107	6.2304	-2.02804	4.36245	1.28614e-05	0.00320853	yes
XLOC_010890	Cd2ap	High	Control	OK	0.69709	2.73372	1.97145	-3.75223	0.000175267	0.0196574	yes
XLOC_010948	Dazl	High	Control	OK	8.63871	28.7077	1.73255	-4.05529	5.00717e-05	0.00849895	yes
XLOC_011011	Ankrd12	High	Control	OK	0.544131	1.86904	1.78027	-3.66473	0.000247598	0.0251264	yes
XLOC_011071	Six2	High	Control	OK	9.26452	3.0139	-1.62009	3.40269	0.000667258	0.0451128	yes
XLOC_011098	na	High	Control	OK	7.76427	0	-1.79769e+308	-1.79769e+308	7.48459e-05	0.0115796	yes
XLOC_011128	na	High	Control	OK	1.44994	6.29405	2.11799	-4.77401	1.80593e-06	0.000688194	yes
XLOC_011136	na	High	Control	OK	0	7.84619	1.79769e+308	1.79769e+308	0.000723418	0.0473379	yes
XLOC_011429	Ythdc2	High	Control	OK	0.900219	3.23155	1.84388	-3.47494	0.00051096	0.0387217	yes
XLOC_011439	Gm5506	High	Control	OK	52.9924	160.792	1.60134	-3.86024	0.000113276	0.0148431	yes
XLOC_011481	Cd74,Mir5107	High	Control	OK	69.4292	16.0681	-2.11134	3.90461	9.43782e-05	0.0135032	yes
XLOC_011512	Tubb6	High	Control	OK	7.90952	1.06744	-2.88944	5.36697	8.00687e-08	5.5772e-05	yes
XLOC_011549	5430411K18Rik	High	Control	OK	0.34394	1.14215	1.73152	-3.39197	0.000693927	0.0462659	yes
XLOC_011564	Tmx3	High	Control	OK	0.384144	2.00336	2.3827	-3.68842	0.000225647	0.0235282	yes
XLOC_011571	Kif5b	High	Control	OK	1.09684	3.95561	1.85054	-3.93126	8.45011e-05	0.012565	yes
XLOC_011580	Rock1	High	Control	OK	0.567511	4.04637	2.83391	-5.52258	3.34057e-08	2.80703e-05	yes
XLOC_011596	Cdh2	High	Control	OK	6.48916	18.8368	1.53745	-3.70713	0.000209618	0.0224177	yes
XLOC_011606	4921528I01Rik	High	Control	OK	4.8817	17.6443	1.85374	-4.3359	1.45168e-05	0.00350909	yes
XLOC_011691	Ccdc112	High	Control	OK	0.798691	3.14983	1.97957	-3.52814	0.000418489	0.0340831	yes
XLOC_011817	na	High	Control	OK	846.289	151.709	-2.47984	3.86345	0.000111797	0.0147483	yes
XLOC_012174	Kif20b	High	Control	OK	0.899539	3.25483	1.85532	-3.86654	0.000110388	0.0146266	yes
XLOC_012194	Hells	High	Control	OK	2.17732	7.16604	1.71862	-3.56882	0.000358588	0.0310865	yes
XLOC_012206	Zfp518a	High	Control	OK	0.460397	2.65409	2.52727	-4.65487	3.24191e-06	0.00109312	yes
XLOC_012298	6720468P15Rik	High	Control	OK	2.90018	0.117681	-4.62319	3.96059	7.47663e-05	0.0115796	yes
XLOC_012374	Malat1	High	Control	OK	4.9135	15.0066	1.61078	-3.86672	0.000110308	0.0146266	yes
XLOC_012442	Pga5	High	Control	OK	0.775514	45.9431	5.88855	-6.65399	2.85245e-11	7.94753e-08	yes
XLOC_012500	Vps13a	High	Control	OK	2.88618	11.2224	1.95914	-4.70198	2.57645e-06	0.00090326	yes
XLOC_012517	Fxn	High	Control	OK	15.7418	3.22906	-2.28541	4.61926	3.85116e-06	0.00124312	yes
XLOC_012536	9930021J03Rik	High	Control	OK	1.65277	6.20499	1.90854	-4.35344	1.34015e-05	0.00329976	yes
XLOC_012670	Rab11fip2	High	Control	OK	3.16714	10.1388	1.67863	-3.44399	0.000573207	0.0405132	yes
XLOC_012689	na	High	Control	OK	14.0854	59.9425	2.08938	-5.04922	4.43606e-07	0.000230232	yes
XLOC_012690	na	High	Control	OK	24.3426	106.254	2.12596	-3.60529	0.000311805	0.0291099	yes
XLOC_012705	na	High	Control	OK	7.14139	46.4333	2.70088	-3.7237	0.000196322	0.021297	yes
XLOC_012707	na	High	Control	OK	3.04283	49.4883	4.0236	-3.73041	0.000191165	0.0210831	yes
XLOC_012708	na	High	Control	OK	4.14687	45.0846	3.44254	-5.21056	1.88274e-07	0.000111987	yes
XLOC_012782	na	High	Control	OK	165.784	52.0376	-1.67168	3.79109	0.000149988	0.0179233	yes
XLOC_012784	na	High	Control	OK	94.379	24.7437	-1.9314	3.55033	0.000384748	0.0325885	yes
XLOC_012836	Mrc1	High	Control	OK	1.18297	3.81784	1.69034	-3.56878	0.000358647	0.0310865	yes
XLOC_012964	Fubp3	High	Control	OK	0.781218	2.75071	1.816	-3.37546	0.000736927	0.0479845	yes
XLOC_013051	Rif1	High	Control	OK	2.24662	9.8261	2.12886	-4.69715	2.63821e-06	0.000918826	yes
XLOC_013090	Ssb	High	Control	OK	3.60491	12.9157	1.84109	-3.52998	0.000415589	0.0339513	yes
XLOC_013112	Scrn3	High	Control	OK	0.499451	2.39726	2.26297	-3.63794	0.000274828	0.0269423	yes
XLOC_013284	A930018P22Rik	High	Control	OK	118.89	42.4642	-1.48531	3.5915	0.000328774	0.0300599	yes
XLOC_013349	Casc5	High	Control	OK	0.313662	1.80887	2.5278	-4.42468	9.65863e-06	0.0026092	yes
XLOC_013446	Mrps26	High	Control	OK	30.6478	8.7555	-1.80752	4.12082	3.77534e-05	0.00691553	yes
XLOC_013470	Plcb4	High	Control	OK	0.72277	2.71088	1.90715	-3.62712	0.000286599	0.0276861	yes
XLOC_013555	Xkr7	High	Control	OK	2.40229	0.570691	-2.07363	3.46937	0.000521672	0.0389866	yes
XLOC_013629	Top1	High	Control	OK	2.46657	9.31398	1.91689	-4.27607	1.9022e-05	0.00421333	yes
XLOC_013714	1700021F07Rik	High	Control	OK	231.973	78.9104	-1.55567	3.80075	0.000144257	0.0173893	yes
XLOC_014017	Prpf40a	High	Control	OK	8.72217	23.2569	1.4149	-3.40653	0.000657947	0.0447692	yes
XLOC_014089	Ccdc141	High	Control	OK	6.21278	18.7517	1.59371	-3.66949	0.000243034	0.0247895	yes
XLOC_014330	4930430A15Rik	High	Control	OK	5.74025	17.3344	1.59446	-3.52541	0.000422821	0.0343302	yes
XLOC_014355	Ryr3	High	Control	OK	1.01238	0.184565	-2.45556	4.83486	1.33237e-06	0.000538421	yes
XLOC_014372	Srp14	High	Control	OK	381.204	141.884	-1.42585	3.47293	0.000514812	0.0388775	yes
XLOC_014374	Gm1337	High	Control	OK	2.0807	0.473632	-2.13523	3.91757	8.94456e-05	0.0129728	yes
XLOC_014430	Secisbp2l	High	Control	OK	0.468326	1.83007	1.96631	-3.76169	0.000168767	0.0192133	yes
XLOC_014720	Sycp2	High	Control	OK	5.82735	17.8906	1.61829	-3.65449	0.000257697	0.0258371	yes
XLOC_014792	na	High	Control	OK	0.335581	9.11781	4.76395	-3.62887	0.000284662	0.0275492	yes
XLOC_014794	na	High	Control	OK	0.068207	4.84512	6.15047	-4.22099	2.43227e-05	0.00508932	yes
XLOC_014833	na	High	Control	OK	0.128559	2.66821	4.37537	-4.08893	4.33369e-05	0.00757151	yes
XLOC_014836	na	High	Control	OK	0	3.17062	1.79769e+308	1.79769e+308	0.00063479	0.0438129	yes
XLOC_014838	na	High	Control	OK	0.208864	3.07939	3.88201	-5.7524	8.79846e-09	1.05857e-05	yes
XLOC_014840	na	High	Control	OK	1.92561	12.1279	2.65494	-6.27624	3.46853e-10	7.0622e-07	yes
XLOC_014846	na	High	Control	OK	19.7559	0.324439	-5.92819	5.9592	2.53481e-09	4.06629e-06	yes
XLOC_014878	na	High	Control	OK	14.07	75.9514	2.43245	-3.56438	0.000364717	0.0313941	yes
XLOC_014879	na	High	Control	OK	7.17094	31.3725	2.12927	-3.39591	0.000684015	0.045778	yes
XLOC_014880	na	High	Control	OK	5.32217	28.7487	2.43341	-3.57046	0.000356353	0.0310274	yes
XLOC_014899	na	High	Control	OK	22.1143	5.78337	-1.935	3.87191	0.000107988	0.0146206	yes
XLOC_014909	na	High	Control	OK	0.508314	3.34073	2.71637	-4.03155	5.54107e-05	0.00916667	yes
XLOC_014938	na	High	Control	OK	9.5558	0	-1.79769e+308	-1.79769e+308	0.000499834	0.0382927	yes
XLOC_015025	na	High	Control	OK	8.22864	1.64027	-2.32672	4.05446	5.02507e-05	0.00849895	yes
XLOC_015071	Lrrcc1	High	Control	OK	13.4314	45.3645	1.75595	-3.95836	7.54652e-05	0.0115796	yes
XLOC_015204	Smc4	High	Control	OK	16.3867	62.1031	1.92214	-4.63392	3.588e-06	0.00118714	yes
XLOC_015233	1700036G14Rik	High	Control	OK	8.53732	0.444937	-4.26211	4.58746	4.48664e-06	0.00137998	yes
XLOC_015267	Ash1l	High	Control	OK	0.452023	1.48651	1.71746	-3.53486	0.000407997	0.0336951	yes
XLOC_015529	Cenpe	High	Control	OK	1.99387	7.30227	1.87277	-4.41907	9.91244e-06	0.00265023	yes
XLOC_015544	Adh1	High	Control	OK	39.5714	11.0159	-1.84487	4.29665	1.73402e-05	0.00395216	yes
XLOC_015657	Ccdc39	High	Control	OK	2.98262	10.8074	1.85736	-3.4721	0.000516412	0.0389032	yes
XLOC_015747	Ift80	High	Control	OK	7.16457	20.53	1.51878	-3.62974	0.000283703	0.0275067	yes
XLOC_015774	Rbm46	High	Control	OK	2.60418	8.73475	1.74594	-3.51478	0.000440116	0.0349833	yes
XLOC_015921	Hist2h2ac	High	Control	OK	87.5281	26.8146	-1.70673	3.85093	0.000117672	0.015294	yes
XLOC_015963	Sycp1	High	Control	OK	3.54969	11.9702	1.75369	-3.71397	0.000204034	0.021909	yes
XLOC_016056	Fnbp1l	High	Control	OK	1.98173	6.53616	1.72168	-3.75777	0.000171436	0.019392	yes
XLOC_016180	na	High	Control	OK	0	5.51013	1.79769e+308	1.79769e+308	0.000249933	0.0252948	yes
XLOC_016197	na	High	Control	OK	0.866893	5.93695	2.7758	-3.66456	0.000247761	0.0251264	yes
XLOC_016236	na	High	Control	OK	3.64166	55.955	3.9416	-3.64711	0.000265209	0.0261934	yes
XLOC_016401	Casp8ap2	High	Control	OK	0.241464	1.47854	2.6143	-4.32144	1.55011e-05	0.00367982	yes
XLOC_016556	Cntln	High	Control	OK	1.46637	5.88858	2.00567	-4.41161	1.02605e-05	0.00270233	yes
XLOC_016645	Slc1a7	High	Control	OK	0.161713	1.91457	3.56551	-4.85909	1.17927e-06	0.000487722	yes
XLOC_016952	na	High	Control	OK	10.9192	1.61649	-2.75593	3.5473	0.000389205	0.0327044	yes
XLOC_016971	Eno1	High	Control	OK	426.716	131.663	-1.69643	3.81929	0.000133836	0.0167116	yes
XLOC_017013	Mxra8	High	Control	OK	37.6304	10.9048	-1.78694	3.9657	7.31801e-05	0.0114616	yes
XLOC_017027	mn2r-ps159,Vmn2r123	High	Control	OK	0.459722	4.22057	3.19861	-4.50986	6.48698e-06	0.00186635	yes
XLOC_017059	Cpne3	High	Control	OK	0.286174	1.32059	2.20622	-3.46728	0.000525749	0.0390901	yes
XLOC_017072	Manea	High	Control	OK	0.559388	2.93861	2.39321	-4.17366	2.99746e-05	0.00576881	yes
XLOC_017185	Abca1	High	Control	OK	0.825162	3.69071	2.16115	-4.44367	8.84383e-06	0.00246408	yes
XLOC_017439	Zfp69	High	Control	OK	4.60192	0.852324	-2.43276	4.56014	5.112e-06	0.00154639	yes
XLOC_017630	Tmem51	High	Control	OK	4.34491	0.608054	-2.83705	4.45025	8.57718e-06	0.00241521	yes
XLOC_017654	1700095A21Rik	High	Control	OK	12.0256	2.37881	-2.3378	3.8686	0.000109461	0.0146266	yes
XLOC_017812	na	High	Control	OK	17.6908	5.40758	-1.70995	3.54574	0.00039151	0.0328029	yes
XLOC_017901	na	High	Control	OK	5.18525	0.832105	-2.63958	4.21036	2.54959e-05	0.00518232	yes
XLOC_017903	na	High	Control	OK	4.15576	0	-1.79769e+308	-1.79769e+308	5.86602e-05	0.00955493	yes
XLOC_017942	na	High	Control	OK	7.71726	2.09539	-1.88087	3.41981	0.000626652	0.0435083	yes
XLOC_017969	na	High	Control	OK	5.29956	0.0741036	-6.16018	4.06341	4.83607e-05	0.00833736	yes
XLOC_017970	na	High	Control	OK	0	20.9154	1.79769e+308	1.79769e+308	0.000676857	0.0455871	yes
XLOC_017994	Akap9	High	Control	OK	0.314546	1.08873	1.7913	-3.67274	0.000239967	0.0245713	yes
XLOC_018022	Sema3c	High	Control	OK	0.48009	2.28211	2.249	-3.98907	6.63324e-05	0.0106088	yes
XLOC_018058	Dpp6	High	Control	OK	1.00942	6.91256	2.77569	-4.73549	2.18527e-06	0.000806166	yes
XLOC_018076	Kcnk3	High	Control	OK	3.71564	1.02352	-1.86008	3.68968	0.000224535	0.0234909	yes
XLOC_018098	Mrpl33	High	Control	OK	86.3079	28.2272	-1.61241	3.68701	0.000226908	0.0235282	yes
XLOC_018137	Crmp1	High	Control	OK	12.6878	2.01684	-2.65327	4.88278	1.04599e-06	0.00044298	yes
XLOC_018256	Dck	High	Control	OK	0.231312	1.49717	2.69432	-3.54484	0.000392857	0.0328029	yes
XLOC_018285	2010109A12Rik	High	Control	OK	8.64943	0.337401	-4.68007	4.2189	2.45493e-05	0.00509644	yes
XLOC_018452	Orai1	High	Control	OK	32.5908	10.4089	-1.64665	3.56782	0.000359969	0.0310865	yes
XLOC_018578	Elfn1	High	Control	OK	2.68529	7.63576	1.50769	-3.44738	0.000566043	0.0403524	yes
XLOC_018666	Steap1	High	Control	OK	7.77168	1.30638	-2.57265	4.2932	1.76113e-05	0.00395216	yes
XLOC_018679	Mir5109	High	Control	OK	1031.55	2966.03	1.52372	-3.66187	0.000250377	0.0252948	yes
XLOC_018721	4930584F24Rik	High	Control	OK	15.1424	0.364348	-5.37713	6.69609	2.14067e-11	7.08266e-08	yes
XLOC_018796	Bod1l	High	Control	OK	0.499527	1.99858	2.00034	-4.29774	1.72552e-05	0.00395216	yes
XLOC_018822	Arap2	High	Control	OK	0.604215	2.57152	2.08948	-4.21503	2.4974e-05	0.00510454	yes
XLOC_018838	Bend4	High	Control	OK	1.1501	3.78215	1.71745	-3.75649	0.000172311	0.0194494	yes
XLOC_019193	Zan	High	Control	OK	0.530615	1.91311	1.85018	-4.17073	3.03623e-05	0.00578172	yes
XLOC_019218	1700123K08Rik	High	Control	OK	12.9031	2.80534	-2.20148	4.39293	1.11835e-05	0.00287394	yes
XLOC_019275	Rnf6	High	Control	OK	5.61162	16.4047	1.54763	-3.38627	0.000708506	0.0468836	yes
XLOC_019301	na	High	Control	OK	0.448783	26.3102	5.87346	-5.7454	9.17041e-09	1.07723e-05	yes
XLOC_019329	na	High	Control	OK	9.70232	2.1197	-2.19447	3.92641	8.6222e-05	0.0126789	yes
XLOC_019465	na	High	Control	OK	6.83534	1.79182	-1.93159	4.13936	3.48282e-05	0.00646924	yes
XLOC_019554	na	High	Control	OK	22.5603	5.85997	-1.94483	3.89276	9.91093e-05	0.0139539	yes
XLOC_019612	na	High	Control	OK	0.223576	7.12526	4.99411	-4.70723	2.51105e-06	0.000892147	yes
XLOC_019620	na	High	Control	OK	21.9253	3.56068	-2.62237	3.36797	0.000757251	0.0488217	yes
XLOC_019641	Peg10	High	Control	OK	1.18343	4.25608	1.84655	-4.03239	5.52118e-05	0.00916239	yes
XLOC_019803	Lrrc61	High	Control	OK	9.51932	2.12159	-2.16571	3.95861	7.53859e-05	0.0115796	yes
XLOC_019908	Retsat	High	Control	OK	23.2629	5.13428	-2.1798	4.97239	6.61312e-07	0.00030981	yes
XLOC_019941	Zfml	High	Control	OK	1.37935	5.17388	1.90725	-3.71612	0.000202305	0.0217676	yes
XLOC_019943	Npm3-ps1	High	Control	OK	54.6479	18.9862	-1.52521	3.56675	0.000361436	0.0311624	yes
XLOC_020152	Nrip2	High	Control	OK	3.33685	0.381642	-3.12819	4.2956	1.74221e-05	0.00395216	yes
XLOC_020228	Rassf8	High	Control	OK	2.08928	0.391145	-2.41723	3.65217	0.000260036	0.0258756	yes
XLOC_020232	4930479D17Rik	High	Control	OK	1.64564	11.0852	2.75192	-4.15837	3.20521e-05	0.00603834	yes
XLOC_020303	Zfp800	High	Control	OK	1.95047	6.95427	1.83407	-3.85051	0.000117873	0.015294	yes
XLOC_020609	Tmf1	High	Control	OK	8.21654	34.513	2.07054	-5.02911	4.92756e-07	0.000247737	yes
XLOC_020896	na	High	Control	OK	46.704	1.82883	-4.67455	6.3803	1.76741e-10	3.74252e-07	yes
XLOC_020901	na	High	Control	OK	1.37809	8.31067	2.5923	-4.85998	1.17397e-06	0.000487722	yes
XLOC_020904	na	High	Control	OK	10.2282	3.01572	-1.76197	3.5327	0.000411342	0.0338641	yes
XLOC_020915	na	High	Control	OK	7.18699	1.43919	-2.32014	5.43313	5.53753e-08	4.31097e-05	yes
XLOC_020919	na	High	Control	OK	0.620562	5.16985	3.05847	-3.39275	0.00069195	0.0461923	yes
XLOC_020932	na	High	Control	OK	2.91486	0.486073	-2.58418	3.53	0.000415555	0.0339513	yes
XLOC_020937	na	High	Control	OK	8.76063	0.791969	-3.46752	4.18034	2.91069e-05	0.00572061	yes
XLOC_020998	na	High	Control	OK	0.522609	10.184	4.28443	-3.99691	6.41745e-05	0.0103575	yes
XLOC_021044	na	High	Control	OK	0	4.09635	1.79769e+308	1.79769e+308	0.000346409	0.0307168	yes
XLOC_021185	Snrpd2	High	Control	OK	674.359	234.097	-1.52641	3.69193	0.000222557	0.0234229	yes
XLOC_021293	Cyp2f2	High	Control	OK	4.34515	0.65192	-2.73664	4.52247	6.11233e-06	0.00179763	yes
XLOC_021336	Map4k1	High	Control	OK	8.26409	2.71128	-1.60788	3.57352	0.00035221	0.0308834	yes
XLOC_021432	Klk1b21	High	Control	OK	2.41249	9.75264	2.01527	-3.62265	0.000291597	0.0279648	yes
XLOC_021930	Acadsb	High	Control	OK	1.76988	5.70948	1.68971	-3.47858	0.000504085	0.0384514	yes
XLOC_022191	Psg19	High	Control	OK	3.91283	0.396089	-3.30432	4.36379	1.27828e-05	0.00320853	yes
XLOC_022206	Clasrp	High	Control	OK	49.2888	15.1594	-1.70104	4.14808	3.35273e-05	0.00626527	yes
XLOC_022209	Apoc2	High	Control	OK	0.474324	15.58	5.03768	-5.71327	1.10828e-08	1.19735e-05	yes
XLOC_022348	Eif3k	High	Control	OK	319.613	101.466	-1.65533	4.02185	5.77419e-05	0.0094636	yes
XLOC_022349	Ryr1	High	Control	OK	0.206223	1.44427	2.80806	-5.72393	1.04088e-08	1.14796e-05	yes
XLOC_022351	Fam98c	High	Control	OK	100.376	28.8816	-1.7972	3.49474	0.000474533	0.0368881	yes
XLOC_022562	C230091D08Rik	High	Control	OK	0.22543	1.39284	2.62728	-3.51618	0.000437811	0.0349308	yes
XLOC_022930	Pik3c2a	High	Control	OK	0.954954	3.06679	1.68323	-3.57524	0.000349912	0.0308213	yes
XLOC_023057	Mki67	High	Control	OK	0.667354	2.01956	1.59752	-3.53951	0.000400864	0.0332096	yes
XLOC_023070	6430531B16Rik	High	Control	OK	144.414	51.5917	-1.485	3.54194	0.0003972	0.0330094	yes
XLOC_023206	na	High	Control	OK	0.534932	4.19031	2.96963	-5.17199	2.31618e-07	0.000131843	yes
XLOC_023208	na	High	Control	OK	2.7786	9.47208	1.76932	-4.17794	2.94157e-05	0.00572061	yes
XLOC_023296	na	High	Control	OK	5.96072	1.5242	-1.96744	4.1001	4.12977e-05	0.00735857	yes
XLOC_023313	na	High	Control	OK	3.71343	0.703299	-2.40054	3.45076	0.000559016	0.0400992	yes
XLOC_023328	na	High	Control	OK	10.2135	1.71974	-2.57022	4.77389	1.807e-06	0.000688194	yes
XLOC_023409	na	High	Control	OK	3.57932	22.2258	2.63448	-3.45299	0.000554409	0.0398768	yes
XLOC_023431	na	High	Control	OK	37.0687	9.98174	-1.89284	4.33954	1.42783e-05	0.00346726	yes
XLOC_023452	na	High	Control	OK	1.17312	5.95181	2.34298	-4.1084	3.98402e-05	0.00724763	yes
XLOC_023474	na	High	Control	OK	4.61424	22.0524	2.25677	-3.38347	0.000715768	0.0472384	yes
XLOC_023656	Tex15	High	Control	OK	2.21836	6.49155	1.54907	-3.59429	0.000325278	0.0298951	yes
XLOC_023680	Pcm1	High	Control	OK	5.44147	17.2999	1.66869	-4.05586	4.99505e-05	0.00849895	yes
XLOC_023717	Nek1	High	Control	OK	2.3597	7.07309	1.58374	-3.57917	0.000344687	0.0306673	yes
XLOC_023731	1700125H03Rik	High	Control	OK	0.315774	26.3251	6.3814	-5.0634	4.11843e-07	0.000218021	yes
XLOC_023785	Zfp961	High	Control	OK	0.327431	2.0704	2.66064	-3.81927	0.00013385	0.0167116	yes
XLOC_023978	Nfat5	High	Control	OK	0.634996	2.41836	1.92921	-4.10733	4.00265e-05	0.00725658	yes
XLOC_024122	4933430N04Rik	High	Control	OK	0.0990373	3.1254	4.97992	-3.38632	0.000708364	0.0468836	yes
XLOC_024198	Adam9	High	Control	OK	0.713456	2.86429	2.00528	-3.72712	0.000193677	0.0211659	yes
XLOC_024676	na	High	Control	OK	14.1163	97.9856	2.79521	-3.68404	0.000229569	0.0237362	yes
XLOC_024677	na	High	Control	OK	19.5572	145.032	2.89059	-3.53189	0.000412603	0.0338641	yes
XLOC_024678	na	High	Control	OK	10.7524	106.266	3.30494	-4.09987	4.1338e-05	0.00735857	yes
XLOC_024681	na	High	Control	OK	13.0419	173.846	3.73658	-3.44114	0.000579271	0.0408328	yes
XLOC_024740	na	High	Control	OK	1.40708	13.4812	3.26018	-4.58639	4.50975e-06	0.00137998	yes
XLOC_024823	na	High	Control	OK	0.389163	4.94084	3.66631	-4.60399	4.1448e-06	0.00129833	yes
XLOC_024872	na	High	Control	OK	16.9142	89.5617	2.40465	-3.5188	0.000433505	0.0348238	yes
XLOC_024888	na	High	Control	OK	0	29.8035	1.79769e+308	1.79769e+308	0.00043722	0.0349308	yes
XLOC_024974	Qtrt1	High	Control	OK	4.40601	1.05522	-2.06193	3.48115	0.000499264	0.0382927	yes
XLOC_025133	Cd3d	High	Control	OK	9.43523	2.54946	-1.88787	3.7309	0.000190795	0.0210831	yes
XLOC_025220	Cyp11a1	High	Control	OK	24.0367	88.7305	1.88419	-4.58758	4.48411e-06	0.00137998	yes
XLOC_025236	Myo9a	High	Control	OK	3.91933	11.1746	1.51154	-3.58397	0.000338406	0.0303636	yes
XLOC_025298	Zfp280d	High	Control	OK	1.23753	4.49235	1.86001	-3.80454	0.000142067	0.017289	yes
XLOC_025301	Nedd4	High	Control	OK	4.09285	11.6357	1.50738	-3.57424	0.000351246	0.0308834	yes
XLOC_025374	Plod2	High	Control	OK	0.291307	1.74494	2.58256	-3.39311	0.000691031	0.0461891	yes
XLOC_025401	na	High	Control	OK	0.962359	5.07466	2.39867	-3.49422	0.00047545	0.0369053	yes
XLOC_025529	Golga4	High	Control	OK	6.68768	22.2213	1.73236	-4.21609	2.48571e-05	0.00510454	yes
XLOC_025559	1700048O20Rik	High	Control	OK	23.318	8.37114	-1.47795	3.36474	0.000766153	0.0491024	yes
XLOC_025569	Kif15	High	Control	OK	1.91301	5.68037	1.57014	-3.5109	0.000446597	0.0353921	yes
XLOC_025595	AK129341	High	Control	OK	10.066	33.6051	1.73919	-4.21561	2.49109e-05	0.00510454	yes
XLOC_025598	4930568E12Rik	High	Control	OK	50.1143	15.0213	-1.73821	3.96339	7.38934e-05	0.0115391	yes
XLOC_025767	Crtam	High	Control	OK	41.6708	9.32444	-2.15995	5.15012	2.60313e-07	0.000145058	yes
XLOC_025819	Zbtb16	High	Control	OK	0.153236	0.934382	2.60826	-3.86074	0.000113043	0.0148431	yes
XLOC_026136	Ccrl2	High	Control	OK	4.50282	1.149	-1.97045	3.53197	0.00041248	0.0338641	yes
XLOC_026190	Tmem158	High	Control	OK	1.96339	0.213897	-3.19836	3.38963	0.000699878	0.046487	yes
XLOC_026244	na	High	Control	OK	0	1.514	1.79769e+308	1.79769e+308	7.51342e-05	0.0115796	yes
XLOC_026267	na	High	Control	OK	5.15607	0.738567	-2.80347	4.20831	2.57283e-05	0.00518232	yes
XLOC_026270	na	High	Control	OK	8.09197	2.05382	-1.97818	4.16526	3.11e-05	0.00590097	yes
XLOC_026318	na	High	Control	OK	36.8967	9.36858	-1.97759	3.40914	0.000651691	0.0445322	yes
XLOC_026371	na	High	Control	OK	72.2029	18.5623	-1.95968	4.61718	3.88982e-06	0.00124799	yes
XLOC_026398	Gm14347	High	Control	OK	0.369827	4.99313	3.75502	-5.21986	1.79062e-07	0.000107718	yes
XLOC_026441	1700054O13Rik	High	Control	OK	258.946	89.797	-1.52791	3.73956	0.000184344	0.0205016	yes
XLOC_026485	Slc6a14	High	Control	OK	0.12986	1.17166	3.17353	-3.46382	0.000532562	0.0391654	yes
XLOC_026492	Gm14354	High	Control	OK	0.941342	20.9382	4.47528	-6.62571	3.45586e-11	9.14731e-08	yes
XLOC_026496	Gm2837	High	Control	OK	0.773372	15.0745	4.2848	-6.04211	1.5211e-09	2.7767e-06	yes
XLOC_026536	Zbtb33	High	Control	OK	0.117821	0.958526	3.02422	-3.44515	0.000570753	0.040502	yes
XLOC_026542	Xiap	High	Control	OK	0.166259	0.921415	2.47042	-3.52021	0.000431198	0.0346912	yes
XLOC_026546	1110059M19Rik	High	Control	OK	10.5329	3.0606	-1.78302	3.43477	0.000593054	0.0416381	yes
XLOC_026710	Taf1	High	Control	OK	0.284727	1.12206	1.9785	-3.58467	0.000337511	0.0303636	yes
XLOC_026735	Atp7a	High	Control	OK	0.21544	1.01295	2.23321	-3.59495	0.00032445	0.0298709	yes
XLOC_026745	Fam46d	High	Control	OK	1.46164	6.09776	2.06069	-3.86703	0.00011017	0.0146266	yes
XLOC_026808	4930513O06Rik	High	Control	OK	4.7815	0.864263	-2.46792	3.52258	0.000427372	0.0345815	yes
XLOC_026809	Mum1l1	High	Control	OK	1.09663	6.44306	2.55468	-4.42025	9.85866e-06	0.00264923	yes
XLOC_026868	Cypt3	High	Control	OK	289.662	96.7481	-1.58207	3.86776	0.000109838	0.0146266	yes
XLOC_026906	Gm14346	High	Control	OK	0.596083	3.77108	2.66139	-3.70533	0.000211118	0.0225325	yes
XLOC_026907	Gm3701	High	Control	OK	0.564165	3.14634	2.47949	-3.39602	0.000683728	0.045778	yes
XLOC_026908	Gm14354	High	Control	OK	0.211631	14.288	6.07712	-5.07261	3.92394e-07	0.000209824	yes
XLOC_027008	Rpl39	High	Control	OK	105.056	34.3743	-1.61175	3.62041	0.000294133	0.028157	yes
XLOC_027142	4930408F14Rik	High	Control	OK	1.50998	17.0506	3.49722	-6.12321	9.17091e-10	1.73389e-06	yes
XLOC_027206	Zfx	High	Control	OK	0.30175	1.38305	2.19642	-3.63219	0.000281023	0.027347	yes
XLOC_027271	Brwd3	High	Control	OK	0.203521	0.943115	2.21226	-3.55912	0.000372107	0.0318232	yes
XLOC_027298	AV320801	High	Control	OK	0.692461	2.78582	2.0083	-3.47952	0.000502315	0.0384194	yes
XLOC_027330	Acsl4	High	Control	OK	0.723332	2.70033	1.90041	-3.36603	0.000762594	0.0489336	yes
XLOC_027429	na	High	Control	OK	1.71984	7.57039	2.13809	-4.68945	2.73934e-06	0.000941658	yes
XLOC_000101	Col3a1	Low	Control	OK	1.18629	5.69332	2.26281	-4.8741	1.09307e-06	0.000459245	yes
XLOC_000265	Gm19589	Low	Control	OK	0.0760437	4.29386	5.8193	-5.44919	5.06002e-08	3.99802e-05	yes
XLOC_001370	na	Low	Control	OK	88.4852	0	-1.79769e+308	-1.79769e+308	0.000548808	0.0396896	yes
XLOC_001411	na	Low	Control	OK	0.355663	11.1497	4.97035	-4.6152	3.92725e-06	0.00125242	yes
XLOC_001581	na	Low	Control	OK	6.61336	0.155834	-5.40731	5.93198	2.99299e-09	4.57052e-06	yes
XLOC_001687	Vnn1	Low	Control	OK	2.04421	7.28358	1.83311	-3.73677	0.0001864	0.0206869	yes
XLOC_002400	Col6a1	Low	Control	OK	0.989191	3.94393	1.99531	-4.17728	2.95011e-05	0.00572061	yes
XLOC_002631	Slc26a10	Low	Control	OK	1.6877	6.41264	1.92586	-3.87924	0.000104784	0.0144079	yes
XLOC_002730	na	Low	Control	OK	1.99873	20.7419	3.37539	-5.64696	1.63314e-08	1.63123e-05	yes
XLOC_002970	Vstm2a	Low	Control	OK	4.39272	0.140095	-4.97063	4.42464	9.66042e-06	0.0026092	yes
XLOC_003017	5730420D15Rik	Low	Control	OK	4.88919	23.441	2.26137	-3.72605	0.000194502	0.0211659	yes
XLOC_003019	Hba-a1,Hba-a2	Low	Control	OK	3.07315	15.0631	2.29323	-3.88227	0.000103487	0.0142666	yes
XLOC_003193	Mfap4	Low	Control	OK	1.07392	6.04942	2.49391	-4.31103	1.62494e-05	0.00382316	yes
XLOC_003312	P2rx5	Low	Control	OK	0.147558	5.60877	5.24833	-6.6821	2.35549e-11	7.20877e-08	yes
XLOC_003497	Col1a1	Low	Control	OK	0.747394	5.64445	2.91689	-5.99017	2.09619e-09	3.46775e-06	yes
XLOC_003513	Gip	Low	Control	OK	2.96065	0	-1.79769e+308	-1.79769e+308	0.000729482	0.0475583	yes
XLOC_004316	Gm11545	Low	Control	OK	0.109028	1.24869	3.51764	-3.82912	0.000128605	0.0163558	yes
XLOC_004356	Arl5c	Low	Control	OK	1.67573	0.104198	-4.00739	3.57656	0.000348139	0.0307168	yes
XLOC_004667	na	Low	Control	OK	0.44791	10.3654	4.53242	-3.60394	0.000313435	0.0291099	yes
XLOC_004668	na	Low	Control	OK	0.792493	5.79184	2.86955	-3.7868	0.000152602	0.0181538	yes
XLOC_004717	na	Low	Control	OK	3.81259	14.1866	1.89568	-3.45507	0.000550153	0.0397326	yes
XLOC_004736	na	Low	Control	OK	0.38445	6.57508	4.09614	-4.51353	6.37589e-06	0.00186479	yes
XLOC_004846	na	Low	Control	OK	10.067	0.363233	-4.7926	5.2199	1.79021e-07	0.000107718	yes
XLOC_005119	Fos	Low	Control	OK	2.02966	0.327327	-2.63243	3.81796	0.000134558	0.0167606	yes
XLOC_005204	Cyp46a1	Low	Control	OK	2.87789	9.29257	1.69107	-3.64005	0.000272581	0.0267716	yes
XLOC_005362	1700030C10Rik	Low	Control	OK	18.0156	5.52844	-1.7043	3.78691	0.000152534	0.0181538	yes
XLOC_005622	1700121N20Rik	Low	Control	OK	2.8298	0.0776181	-5.18816	3.39616	0.000683396	0.045778	yes
XLOC_005623	4933406K04Rik	Low	Control	OK	23.7682	0.862094	-4.78504	6.55306	5.63685e-11	1.29741e-07	yes
XLOC_005642	Gm266	Low	Control	OK	0	3.91237	1.79769e+308	1.79769e+308	8.66465e-05	0.0127061	yes
XLOC_005783	na	Low	Control	OK	0.763847	5.55091	2.86137	-3.76322	0.000167739	0.0191929	yes
XLOC_005862	na	Low	Control	OK	0.159977	23.8615	7.22067	-4.90315	9.43127e-07	0.000402639	yes
XLOC_005863	na	Low	Control	OK	0	54.4289	1.79769e+308	1.79769e+308	0.000723418	0.0473379	yes
XLOC_005883	na	Low	Control	OK	7.67073	0.662327	-3.53375	3.75515	0.000173235	0.0194708	yes
XLOC_006675	Atp6ap1l	Low	Control	OK	37.8016	1.42001	-4.73448	8.44694	0	0	yes
XLOC_006927	na	Low	Control	OK	46.1331	5.48024	-3.07349	3.65646	0.000255727	0.0256882	yes
XLOC_007145	AY358078	Low	Control	OK	1.82877	0.15625	-3.54895	3.81403	0.000136719	0.0168317	yes
XLOC_007492	Gm10377	Low	Control	OK	78.4608	20.9029	-1.90827	4.52586	6.01494e-06	0.00177888	yes
XLOC_007493	Gm10377	Low	Control	OK	78.5356	26.608	-1.56149	3.74173	0.000182756	0.0203678	yes
XLOC_007494	Gm10377	Low	Control	OK	63.3632	21.0541	-1.58954	3.7605	0.000169574	0.0192638	yes
XLOC_007495	1700001F09Rik	Low	Control	OK	163.145	48.0995	-1.76206	4.2996	1.71105e-05	0.00395216	yes
XLOC_007496	Gm10375	Low	Control	OK	56.6086	20.1919	-1.48724	3.50017	0.000464961	0.0364388	yes
XLOC_008233	Mgat3	Low	Control	OK	1.75409	0.202851	-3.11224	4.82782	1.38036e-06	0.000549426	yes
XLOC_008347	Aqp2	Low	Control	OK	0.963365	5.36061	2.47624	-4.09248	4.26788e-05	0.00750608	yes
XLOC_008756	9430014N10Rik	Low	Control	OK	0.167317	6.97505	5.38155	-4.29425	1.75282e-05	0.00395216	yes
XLOC_008955	na	Low	Control	OK	1.71397	9.95435	2.53798	-4.83057	1.36141e-06	0.000545987	yes
XLOC_009075	na	Low	Control	OK	0	2.72729	1.79769e+308	1.79769e+308	0.000388572	0.0327044	yes
XLOC_009076	na	Low	Control	OK	0	2.82056	1.79769e+308	1.79769e+308	0.000309767	0.0290753	yes
XLOC_009197	Fetub	Low	Control	OK	10.1013	1.13905	-3.14863	4.78475	1.71198e-06	0.00066639	yes
XLOC_009382	Mrap	Low	Control	OK	1.43469	6.09591	2.0871	-3.60936	0.000306959	0.0290175	yes
XLOC_009811	na	Low	Control	OK	3.67601	22.6966	2.62626	-4.61325	3.96413e-06	0.00125294	yes
XLOC_009812	na	Low	Control	OK	2.20609	11.625	2.39767	-4.36163	1.29097e-05	0.00320853	yes
XLOC_009813	na	Low	Control	OK	10.6905	69.5056	2.7008	-5.87881	4.13217e-09	5.75655e-06	yes
XLOC_009814	na	Low	Control	OK	4.14425	23.0887	2.478	-4.17289	3.00765e-05	0.00576881	yes
XLOC_009815	na	Low	Control	OK	11.5554	66.2688	2.51976	-4.64254	3.44154e-06	0.00114584	yes
XLOC_009816	na	Low	Control	OK	21.3685	88.0258	2.04244	-4.22258	2.41517e-05	0.00507358	yes
XLOC_009818	na	Low	Control	OK	13.6207	54.8169	2.00882	-4.84205	1.2851e-06	0.000527368	yes
XLOC_010154	Itpr3	Low	Control	OK	18.6721	1.27971	-3.86699	6.67626	2.45113e-11	7.20877e-08	yes
XLOC_010187	Dnahc8	Low	Control	OK	24.7337	91.8565	1.8929	-4.21969	2.4464e-05	0.00509644	yes
XLOC_010191	Ubash3a	Low	Control	OK	13.8766	2.45936	-2.4963	5.62328	1.87366e-08	1.78344e-05	yes
XLOC_010347	Rn45s	Low	Control	OK	1600.55	4541.83	1.50471	-3.58065	0.000342738	0.0305452	yes
XLOC_010494	Galm	Low	Control	OK	6.26661	33.27	2.40847	-5.61224	1.9973e-08	1.85496e-05	yes
XLOC_011023	Emilin2	Low	Control	OK	3.22258	0.132936	-4.59942	6.9869	2.81042e-12	1.0627e-08	yes
XLOC_011056	Cdkl4	Low	Control	OK	9.91795	2.16356	-2.19664	4.72744	2.27366e-06	0.000824403	yes
XLOC_011098	na	Low	Control	OK	4.42572	0	-1.79769e+308	-1.79769e+308	0.000439803	0.0349833	yes
XLOC_011273	na	Low	Control	OK	0.387832	3.04043	2.97077	-3.59945	0.000318886	0.0295126	yes
XLOC_011439	Gm5506	Low	Control	OK	36.6049	160.792	2.13509	-5.16553	2.39754e-07	0.000135022	yes
XLOC_011512	Tubb6	Low	Control	OK	23.1426	1.06744	-4.43832	8.44931	0	0	yes
XLOC_011777	Lipg	Low	Control	OK	0.753667	3.45033	2.19473	-4.19699	2.70481e-05	0.00540328	yes
XLOC_011821	na	Low	Control	OK	5.99135	0.948644	-2.65894	3.58826	0.000332897	0.0301423	yes
XLOC_011928	na	Low	Control	OK	4.8496	0.12704	-5.25451	5.4087	6.34838e-08	4.73339e-05	yes
XLOC_012041	Fads1	Low	Control	OK	8.63245	28.6841	1.73241	-4.17946	2.92205e-05	0.00572061	yes
XLOC_012431	Fads2	Low	Control	OK	16.8412	58.6633	1.80047	-4.26635	1.98696e-05	0.00438273	yes
XLOC_012635	Cyp17a1	Low	Control	OK	51.5949	225.657	2.12883	-5.12009	3.05396e-07	0.000168407	yes
XLOC_012659	Afap1l2	Low	Control	OK	0.110584	1.14514	3.37231	-4.22404	2.3996e-05	0.00507358	yes
XLOC_012712	na	Low	Control	OK	0	3.23725	1.79769e+308	1.79769e+308	0.000723418	0.0473379	yes
XLOC_012963	Ass1	Low	Control	OK	6.48647	35.9595	2.47087	-5.54064	3.0136e-08	2.61531e-05	yes
XLOC_013217	Olfr1188	Low	Control	OK	3.75388	0	-1.79769e+308	-1.79769e+308	0.000548808	0.0396896	yes
XLOC_013446	Mrps26	Low	Control	OK	26.325	8.7555	-1.58817	3.61463	0.000300779	0.0285864	yes
XLOC_013903	Sardh	Low	Control	OK	1.81178	5.20398	1.52221	-3.39952	0.00067504	0.0455807	yes
XLOC_014020	BB557941	Low	Control	OK	0	3.18218	1.79769e+308	1.79769e+308	0.000309767	0.0290753	yes
XLOC_014089	Cwc22	Low	Control	OK	1.5212	18.7517	3.62375	-7.71859	1.17684e-14	6.22994e-11	yes
XLOC_014275	Creb3l1	Low	Control	OK	0.89964	3.77768	2.07008	-3.90945	9.2508e-05	0.0132715	yes
XLOC_014846	na	Low	Control	OK	6.28692	0.324439	-4.27633	4.21666	2.47945e-05	0.00510454	yes
XLOC_014938	na	Low	Control	OK	10.2451	0	-1.79769e+308	-1.79769e+308	0.000424503	0.034414	yes
XLOC_014998	na	Low	Control	OK	8.65575	0.21635	-5.32222	3.48954	0.000483844	0.0373378	yes
XLOC_015233	1700036G14Rik	Low	Control	OK	6.71948	0.444937	-3.91668	4.1927	2.75652e-05	0.00548589	yes
XLOC_015746	Rarres1	Low	Control	OK	5.48739	17.5739	1.67925	-3.6164	0.000298728	0.0284938	yes
XLOC_015796	Fcrls	Low	Control	OK	0	1.05449	1.79769e+308	1.79769e+308	0.00043722	0.0349308	yes
XLOC_015807	Rhbg	Low	Control	OK	1.17465	4.57471	1.96145	-3.54755	0.000388838	0.0327044	yes
XLOC_016645	Slc1a7	Low	Control	OK	0.244403	1.91457	2.96969	-4.41627	1.00416e-05	0.00267128	yes
XLOC_016936	1700029I01Rik,Gm13139	Low	Control	OK	10.4018	2.23876	-2.21606	4.25529	2.08783e-05	0.00456717	yes
XLOC_016954	na	Low	Control	OK	11.4762	0	-1.79769e+308	-1.79769e+308	0.000548808	0.0396896	yes
XLOC_017027	Vmn2r-ps159,Vmn2r123	Low	Control	OK	0.260466	4.22057	4.01827	-4.91748	8.76666e-07	0.000380401	yes
XLOC_017654	1700095A21Rik	Low	Control	OK	15.3294	2.37881	-2.68798	4.39706	1.09729e-05	0.00283359	yes
XLOC_017748	na	Low	Control	OK	11.8849	0.374704	-4.98723	4.9937	5.92335e-07	0.000282496	yes
XLOC_017830	na	Low	Control	OK	0.887182	4.13103	2.2192	-3.38398	0.000714426	0.0472164	yes
XLOC_017873	na	Low	Control	OK	8.97492	0.522158	-4.10334	5.76709	8.06528e-09	9.9293e-06	yes
XLOC_017881	na	Low	Control	OK	0	10.8187	1.79769e+308	1.79769e+308	8.73913e-06	0.00244779	yes
XLOC_017883	na	Low	Control	OK	12.6247	1.86493	-2.75906	3.88957	0.000100421	0.0140267	yes
XLOC_017884	na	Low	Control	OK	33.245	2.62854	-3.66081	3.90371	9.47287e-05	0.0135168	yes
XLOC_017939	na	Low	Control	OK	356.148	0	-1.79769e+308	-1.79769e+308	0.000536513	0.0392834	yes
XLOC_017969	na	Low	Control	OK	4.36677	0.0741036	-5.88088	3.87275	0.000107613	0.0146206	yes
XLOC_017970	na	Low	Control	OK	0	20.9154	1.79769e+308	1.79769e+308	0.000676857	0.0455871	yes
XLOC_018058	Dpp6	Low	Control	OK	1.7032	6.91256	2.02098	-4.01366	5.97855e-05	0.00970835	yes
XLOC_018121	A930005I04Rik	Low	Control	OK	1.80024	0.235847	-2.93227	4.29311	1.76189e-05	0.00395216	yes
XLOC_018285	2010109A12Rik	Low	Control	OK	8.19238	0.337401	-4.60175	4.14751	3.36117e-05	0.00626527	yes
XLOC_018721	4930584F24Rik	Low	Control	OK	27.7175	0.364348	-6.24934	7.84678	4.21885e-15	2.61213e-11	yes
XLOC_018822	Arap2	Low	Control	OK	0.480325	2.57152	2.42054	-4.72746	2.27348e-06	0.000824403	yes
XLOC_019401	na	Low	Control	OK	14.6844	0	-1.79769e+308	-1.79769e+308	2.93879e-05	0.00572061	yes
XLOC_019431	na	Low	Control	OK	4.82796	0.389167	-3.63295	3.49943	0.00046626	0.0364592	yes
XLOC_019639	Col1a2	Low	Control	OK	2.51183	10.1444	2.01387	-4.62585	3.73073e-06	0.00121912	yes
XLOC_019803	Lrrc61	Low	Control	OK	13.6141	2.12159	-2.68189	5.23514	1.64858e-07	0.000102674	yes
XLOC_019902	Sftpb	Low	Control	OK	4.10905	0.316525	-3.69841	4.67725	2.90754e-06	0.000993027	yes
XLOC_020152	Nrip2	Low	Control	OK	2.68484	0.381642	-2.81454	4.12867	3.64874e-05	0.00673022	yes
XLOC_020258	Pon3	Low	Control	OK	0.827971	4.28464	2.37152	-3.80243	0.000143284	0.0173221	yes
XLOC_020628	Oxtr	Low	Control	OK	0.790308	2.66969	1.75618	-3.46372	0.000532761	0.0391654	yes
XLOC_020896	na	Low	Control	OK	37.6572	1.82883	-4.36393	5.92318	3.15767e-09	4.64336e-06	yes
XLOC_020936	na	Low	Control	OK	0.707494	10.896	3.94493	-3.60196	0.000315821	0.0292801	yes
XLOC_020937	na	Low	Control	OK	15.4246	0.791969	-4.28365	5.25762	1.4593e-07	9.3075e-05	yes
XLOC_021336	Map4k1	Low	Control	OK	8.54304	2.71128	-1.65578	3.68756	0.000226415	0.0235282	yes
XLOC_021431	Klk1b27	Low	Control	OK	0.532749	8.7523	4.03814	-5.46015	4.7573e-08	3.86795e-05	yes
XLOC_021432	Klk1b21	Low	Control	OK	0.602733	9.75264	4.0162	-5.59496	2.20671e-08	2.01412e-05	yes
XLOC_021435	Klk1b24	Low	Control	OK	0.753674	10.6572	3.82174	-5.52955	3.21057e-08	2.74131e-05	yes
XLOC_022021	Dhcr7	Low	Control	OK	3.03324	9.35165	1.62436	-3.57255	0.000353525	0.0309248	yes
XLOC_022349	Ryr1	Low	Control	OK	0.233363	1.44427	2.62969	-5.48596	4.11227e-08	3.40149e-05	yes
XLOC_022708	Thrsp	Low	Control	OK	1.15357	5.42056	2.23234	-3.72949	0.000191867	0.0211068	yes
XLOC_022793	Hbb-b1,Hbb-b2	Low	Control	OK	1.19305	9.65339	3.01638	-3.89858	9.67569e-05	0.0136955	yes
XLOC_022794	Beta-s	Low	Control	OK	5.8588	23.114	1.98009	-3.8462	0.000119963	0.0154839	yes
XLOC_023296	na	Low	Control	OK	4.87136	1.5242	-1.67627	3.4636	0.000533002	0.0391654	yes
XLOC_023431	na	Low	Control	OK	0.641448	9.98174	3.95989	-6.01945	1.75014e-09	3.04713e-06	yes
XLOC_023549	Proz	Low	Control	OK	1.18185	0.0692933	-4.09219	3.65953	0.000252675	0.0254783	yes
XLOC_023633	Star	Low	Control	OK	6.53202	33.1239	2.34227	-5.62209	1.88659e-08	1.78344e-05	yes
XLOC_023851	Klf1	Low	Control	OK	0.239142	1.81133	2.92111	-3.83651	0.000124794	0.0159787	yes
XLOC_024057	Cpne7	Low	Control	OK	1.69486	0.227968	-2.89426	4.10568	4.0313e-05	0.00728358	yes
XLOC_024408	Junb	Low	Control	OK	8.49576	2.6295	-1.69196	3.55596	0.000376595	0.0321034	yes
XLOC_025220	Cyp11a1	Low	Control	OK	12.5528	88.7305	2.82143	-6.76124	1.36813e-11	4.8284e-08	yes
XLOC_025319	4933433G15Rik	Low	Control	OK	1.88614	12.3828	2.71483	-5.0437	4.56604e-07	0.000234677	yes
XLOC_026057	1300017J02Rik	Low	Control	OK	1.77211	5.97078	1.75245	-3.55691	0.000375244	0.0320398	yes
XLOC_026294	na	Low	Control	OK	5.68869	0.14607	-5.28337	3.46278	0.000534621	0.0391991	yes
XLOC_026295	na	Low	Control	OK	12.2738	0	-1.79769e+308	-1.79769e+308	0.000548808	0.0396896	yes
XLOC_026492	Gm14354	Low	Control	OK	0.230663	20.9382	6.50421	-5.67943	1.35146e-08	1.37584e-05	yes
XLOC_026496	Gm2837	Low	Control	OK	1.07184	15.0745	3.81394	-5.79121	6.98826e-09	8.8082e-06	yes
XLOC_026908	Gm14354	Low	Control	OK	0.155406	14.288	6.52263	-4.76541	1.88467e-06	0.000712648	yes
XLOC_027038	Apln	Low	Control	OK	0.900385	3.49285	1.95579	-3.60469	0.000312527	0.0291099	yes
XLOC_027142	4930408F14Rik	Low	Control	OK	1.75297	17.0506	3.28195	-5.93041	3.0218e-09	4.57052e-06	yes
XLOC_027280	Vmn2r121	Low	Control	OK	0.0588785	2.13699	5.18169	-3.82429	0.000131147	0.0165696	yes
